# Dinophiliformia early neurogenesis suggests the evolution of conservative neural structures across the Annelida phylogenetic tree

Elizaveta Fofanova<sup>1</sup>, Tatiana D. Mayorova<sup>1,2</sup>, Elena E. Voronezhskaya<sup>1</sup>

<sup>1</sup>Department of Comparative and Developmental Physiology, Koltzov Institute of Developmental Biology RAS Moscow, Russia

<sup>2</sup>Laboratory of Neurobiology, National Institute of Neurological Disorders and Stroke, Bethesda, MD, USA

Corresponding Author:

Elizaveta Fofanova<sup>1</sup>

Vavilova street, 26, Moscow, 119334, Russia

Email address: fofanova@idbras.ru

## Abstract

Despite the increasing data concerning the structure of the adult nervous system in various Lophotrochozoa groups, the early events during the neurogenesis of rare and unique groups need clarification. Annelida are a diverse clade of Lophotrochozoa, and their representatives demonstrate a variety of body plans, lifestyles, and life cycles. Comparative data about the early development are available for Errantia, Sedentaria, Sipuncula and Palaeoannelida; however, our knowledge of Dinophiliformia is currently scarce. Representatives of Dinophiliformia are small interstitial worms combining unique morphological features of different Lophotrochozoan taxa and expressing paedomorphic traits. We describe in detail the early neurogenesis of two related species: *Dimorphilus gyrociliatus* and *Dinophilus vorticoides*, from the appearance of first nerve cells until the formation of an adult body plan. In both species, the first cells were detected at the anterior and posterior regions at the early trochophore stage and demonstrated positive reactions with pan-neuronal marker anti-acetylated tubulin only. Long fibers of early cells grow towards

each other and form longitudinal bundles along which differentiating neurons later appear and send their processes. We propose that these early cells serve as pioneer neurons, forming a layout of the adult nervous system. The early anterior cell of *D. vorticoides* is transient and present during the short embryonic period, while early anterior and posterior cells in *D. gyrotilatus* are maintained throughout the whole lifespan of the species. During development, the growing processes of early cells form compact brain neuropile, paired ventral and lateral longitudinal bundles; unpaired medial longitudinal bundle; and commissures in the ventral hyposphere. Specific 5-HT- and FMRFa-immunopositive neurons differentiate adjacent to the ventral bundles and brain neuropile in the middle trochophore and late trochophore stages, i.e. after the main structures of the nervous system have already been established. Processes of 5-HT- and FMRFa-positive cells constitute a small proportion of the tubulin-immunopositive brain neuropile, ventral cords, and commissures in all developmental stages. No 5-HT- and FMRFa-positive cells similar to apical sensory cells of other Lophotrochozoa were detected. We conclude that: (i) like in Errantia and Sedentaria, Dinophiliformia neurogenesis starts from the peripheral cells, whose processes prefigure the forming adult nervous system, (ii) Dinophiliformia early cells are negative to 5-HT and FMRFa antibodies like Sedentaria pioneer cells.

## Introduction

Annelida are a diverse group of organisms with a variety of adult and larval body plans. Recent studies on neurogenesis have been focused on the species having free-swimming larvae in their life cycle: Sedentaria (*C. teleta*, *M. fuliginosus*); Errantia (*P. dumerilii*, *P. maculata*), Palaeoannelida (*O. fusiformis*), and Sipuncula (*T. lageniformis*). Detailed data concerning the neurogenesis of Chaetopteriformia, Amphinomida, and Dinophiliformia are absent.

Our study is focused on early neurogenesis events in two species of the group Dinophiliformia, small interstitial worms combining unique morphological features of different Lophotrochozoan taxa and expressing paedomorphic traits. Dinophiliformia have segmented epithelial structures like other Annelida, although they have no chaeta; they possess parenchymatous organization and protonephridia similar to Platyhelminthes; and utilize gliding ciliary locomotion like meiobenthic invertebrates and mollusks. Representatives of Dinophiliformia have direct development inside the egg capsule packed in cocoon and hatch as small worms; however, they possess specific ciliary structures (prototroch, ventral ciliary field) similar to free-swimming larvae (*Beklemishev & Kabata, 1969; Fofanova, Nezlin & Voronezhskaya, 2014; Kerbl et al., 2016a*). Moreover, the adult species resemble a trochophore larva in that they maintain prototroch, ciliary bands, ventral ciliary field, and protonephridia. Such characteristics allows to call the adult species of Dinophiliformia “*neotenic trochophore*” (*Beklemishev & Kabata, 1969*). A later study of Dinophiliformia demonstrated paedomorphic traits in the adult nervous, muscular, and ciliary systems and supported the progenetic origin of Dinophiliformia (*Windoffer & Westheide, 1988; Kerbl et al., 2016b*). From one point of view, an interstitial environment (bottom marine environment or meiobenthic) may drive the paedomorphic evolution (*Westheide, 1987*), while another author suggests that interstitial organisms first appeared in evolution (*Boaden, 1989*). In both cases, the paedomorphic animals demonstrate simplified features that probably correspond to the early ontogenetic stages of an ancestral taxon. Moreover, the nervous system is one of the most conservative structures, the comparative analysis of which may infer the basal plan of the last common ancestor. That is why the structure of the Dinophiliformia nervous system has attracted the particular attention of researchers (*Fofanova & Voronezhskaya, 2012; Fofanova, Nezlin & Voronezhskaya, 2014; Kerbl et al.,*

2016b, a, 2017). However, the specification of the earliest differentiating cells expressing neuronal phenotype, the arrangement of their processes, and their fate in the course of development have not been addressed in these animals.

In a variety of Lophotrochozoan species, the first neurons appear as early as the trochophore stage during development (*Schmidt-Rhaesa, Harzsch & Purschke, 2015*). They are often located peripherally, and their emanating processes establish the network resembling the *anlagen* of the developing adult (definitive) nervous system. Therefore, in some species of mollusks and annelids, the early peripheral cells were speculated to serve the function of pioneer neurons (*Croll & Voronezhskaya, 1996; Voronezhskaya, Tyurin & Nezhlin, 2002; Voronezhskaya & Elekes, 2003; Voronezhskaya & Ivashkin, 2010; Nezhlin & Voronezhskaya, 2017; Yurchenko et al., 2019; Kumar et al., 2020*). Pioneer neurons were first described in insect development and represent the cells whose processes navigate or pioneer the growing axons of later differentiating neurons (*Bate, 1976; Klose & Bentley, 1989*).

Among Lophotrochozoa, the first neurons demonstrate a positive reaction to serotonin antibodies (5-HT-IR) in Annelida and Nemertea (*Voronezhskaya, Tsitrin & Nezhlin, 2003; Fischer, Henrich & Arendt, 2010; Chernyshev & Magarlamov, 2010*), while in mollusks they are positive to anti-FMRFamide antibodies (FMRFa-IR) (*Croll & Voronezhskaya, 1996; Dickinson, Croll & Voronezhskaya, 2000; Voronezhskaya, Tyurin & Nezhlin, 2002; Voronezhskaya, Tsitrin & Nezhlin, 2003; Dickinson & Croll, 2003*). These researches used a limited number of markers: acetylated alpha-tubulin, serotonin (5-HT), or FMRFamide (FMRFa) antibody to visualize the location and morphology of the earliest nerve cells. Until now, no specific markers were found for the early peripheral cells apart from the generally used immunolabelling (*Conzelmann & Jékely, 2012; Kumar et al., 2020*).



In addition to the early peripheral neurons, the other nerve elements were found in the trochophore stage, which belong to the apical or aboral sensory organ (ASO) of the larvae (*Lacalli, 1981, 1994; Page & Parries, 2000; Page, 2002; Page, 2002; Nielsen, 2004, 2005*). The ASO is a part of the larval nervous system, located at the anterior pole of larvae, and comprises an apical ciliary tuft and receptor cells. In most representatives of Lophotrochozoa, the ASO consists of a specific number of flask-shaped receptor cells and displays serotonin-like immunoreactivity, and sometimes also FMRFamide-like immunoreactivity. The long basal processes of apical cells form a compact apical neuropile (*Richter et al., 2010*). While *Dinophiliformia* belongs to the lophotrochozoan Annelida, no ASO sign has been mentioned in their representatives.

Typically, in the course of development, the other elements of the larval nervous system (prototroch nerve, hyosphere nerve ring, etc.) and the anlagen of the adult nervous system (cerebral ganglia, ventral nerve cords, esophageal nerve circle, etc.) emerge soon after the appearance of the early peripheral and ASO neurons in most Lophotrochozoa (*Nezlin, 2010; Hejnol & Lowe, 2015; Nezlin & Voronezhskaya, 2017; Yurchenko et al., 2019; Kumar et al., 2020*).

*Dinophiliformia* includes three clades: *Lobatocerebrum*, *Dinophilus*, and *Dimorphilus* (*Martín-Durán et al., 2021; Worsaae et al., 2021*). We chose *Dinophilus vorticoides* and *Dimorphilus gyrociliatus* to analyze the cells, which express positive immunoreaction against a pan-neural marker – acetylated  $\alpha$ -tubulin, in combination with immunoreaction to specific neuronal markers – 5-HT and FMRFamide, during these worms' development inside the egg capsule. We emphasize the time of appearance and location of the early peripheral cells, their fate, and the path of their processes; we analyze the relation between the early peripheral cells and the cells

differentiating within the structures of the forming adult nervous system. We also searched for cells expressing the ASO phenotype in both normal and experimental conditions of increased 5-HT synthesis. Our work presents a detailed description of the neural cells from the first appearance until the formation of the main structures of the adult nervous system.

## **Materials and Methods**

### **Culture maintaining**

The *Dimorphilus gyrocoliatius* culture was obtained from the Mediterranean Sea, Napoli Zoological Station (Italy). The animals were reared in small plastic aquaria with artificial seawater (33‰ salinity) at 21 °C without aeration and fed with homogenized frozen nettle (*Urtica sp.*) leaves once a week. The worms lay cocoons on the substrate, the wall, or the base of the plate. During daily water change, we collected all the cocoons and put them into fresh vials. Thus, we obtained the dated developmental stages from cleavage to pre-hatch specimens. *D. gyrocoliatius* cocoons contained 1-9 large (female) representatives and several small (dwarf male) representatives (Shearer, 1911; Mauri, Baraldi & Simonini, 2003). In our work, we studied only females of *D. gyrocoliatius*.

The work on *Dinophilus vorticoides* was conducted during the summer seasons at the White Sea, Pertsov White Sea Biological Station. The worms were collected in a subtidal zone during a low tide. We kept them in small tanks without aeration and six-well plates (for working with adhesive cell cultures) at 10 °C in filtered seawater and fed them with diatom *Phaeodactylum sp.* and *Pseudinicshea delicatissima* every day. Water was changed every time before feeding. The cocoons of *D. vorticoides* contained up to 30 representatives of the same size and both sexes. Both Dinophiliformia species laid cocoons regularly. The cocoons were gently removed from the aquaria using a glass Pasteur pipette and placed into 30 mm Petri dishes with filtered seawater. The egg capsules were mechanically extracted from the cocoon and fertilization envelope with

tiny needles for further immunocytochemical procedures. *Dinophilus* and *Dimorphilus* curl up after the gastrula stage with the ventral side out during the further early-late trochophore stages.

Therefore, our images often show curved specimens, especially during the late stages.

### **Immunocytochemistry**

*D. gyrociliatus* and *D. vorticoides* at various developmental stages were subjected to whole-mount immunostaining using standard protocols and a range of markers. Each staining was carried out using at least 40-50 specimens of each developmental stage. Antibodies against the neurotransmitters serotonin (5-HT), FMRFamide (FMRFa), and acetylated alpha-tubulin, as a neuronal, pan-neuronal, and ciliary marker, were used together with confocal laser scanning microscopy. This set of antibodies has been successfully applied to investigate neurogenesis in a variety of invertebrate larvae. Antibodies against acetylated tubulin, the neuropeptide RFamide, and the monoamine transmitter serotonin label individual neurons and their processes, as well as tubulin-containing ciliary structures (*Schmidt-Rhaesa, Harzsch & Purschke, 2015*). The specificity of the antibodies used in our study has previously been shown in various representatives of lophotrochozoan taxa including mollusks and annelids (*Voronezhskaya & Elekes, 1996; Dickinson, Croll & Voronezhskaya, 2000; Voronezhskaya, Tsitrin & Nezhlin, 2003; Wanninger et al., 2005; Kristof, Wollesen & Wanninger, 2008; Dyachuk & Odintsova, 2009; Fischer, Henrich & Arendt, 2010; Carrillo-Baltodano et al., 2019; Kumar et al., 2020; Carrillo-Baltodano et al., 2021*).

The representatives of *Dinophilus vorticoides* and *Dimorphilus gyrociliatus* at different developmental stages were fixed with 4% paraformaldehyde (PFA) in phosphate-buffered saline (PBS, 0.01mM, pH=7.4) at 4 °C overnight. After fixation, the samples were washed three times at 15-minute intervals in PBS and incubated in a blocking solution (10% normal goat serum and

1% bovine serum albumin in PBS) for 30 minutes at room temperature to eliminate non-specific binding. Then, preparations were incubated with primary antibodies for 3 days at 10 °C. We used anti-acetylated  $\alpha$ -tubulin antibodies (Sigma-Aldrich, USA; T-6793; mouse; monoclonal: clone 6-11B-1, ascites fluid) diluted 1:5000-1:10000 in PBS containing 0.1% Triton X-100 (PBS-TX) to label stabilized microtubules in ciliary bands and neural elements. Specific neural cells were marked with anti-5HT and anti-FMRFa antibodies (Immunostar, USA; 428002; rabbit; polyclonal; Product ID: 20080 and Immunostar, USA; 410002; rabbit; polyclonal; Product ID: 20091). Primary antibodies were washed three times for 10 minutes in PBS-TX solution. The primary antibodies were visualized with respective secondary goat-anti-rabbit and goat-anti-mouse antibodies conjugated with Alexa-488 (1:1000, Molecular Probes, USA; A-11008; goat; polyclonal) and Alexa-633 (1:1000, USA; A-21050; goat; polyclonal, Molecular Probes) diluted in PBS containing 0.1% Triton X-100 overnight at 10 °C. Then, the preparations were washed with PBS three times for 10 minutes. Replacement of the primary antibodies with serum resulted in no staining. Reversal of the secondary antibodies (Alexa 633 and Alexa 488) gave the same staining pattern.

Cell nuclei were stained with DAPI (0.25  $\mu$ g/ml) during the second washing. After washing in PBS, the specimens were mounted on glass slides in 70% glycerol for microscopic analysis and image acquisition. The elements demonstrating positive reactions were considered 5-HT and FMRFa immunoreactive (5-HT-IR and FMRFa-IR, respectively).

Confocal scanning microscopes TCS-SPE, TCS-SP5 (Leica Microsystems, Germany), and Nikon A1 (Nikon, Japan) equipped with the appropriate set of lasers, filters, and detectors were used for the detailed study of the various developmental stages. Stacks of optical sections taken with x63 objectives and 0.3–0.5  $\mu$ m intervals were processed with Leica LAS AF (Leica

Microsystems, Germany) and Image J (NIH, USA) to obtain two-dimensional images. For each sample, the optimal number of stacks was selected to demonstrate the structures of interest.

Optical sections were projected onto one image and then imported into the Adobe Photoshop CC; the only parameters to be changed were brightness and contrast.

### **Application of 5-HT and its biochemical precursor 5-HTP**

*D. vorticooides* at different developmental stages were incubated in  $10^{-5}$  M serotonin (5-HT) and 5-hydroxytryptophan (5-HTP) (Sigma-Aldrich, USA) for 3 hours. Fresh stock solutions in distilled water ( $10^{-2}$  M) were prepared immediately before each experiment. Negative controls for each experiment included treatment of animals with the final concentration of vehicle (distilled water) in filtered seawater. The experiments were performed at 10 °C. After the incubation, the animals were washed with filtered seawater four times and were then fixed and stained with anti-5-HT and anti-tubulin antibodies as described above.

## **Results**

### **Relative staging**

Duration of development within the egg capsule differs in *Dimorphilus*

*gyrociliatus* and *Dinophilus vorticooides*. *D. gyrociliatus* hatch after 5 days, whereas *D.*

*vorticooides* hatch approximately 2 weeks after oviposition. External ciliary structures develop sequentially in the anterior-to-posterior direction in both species. Each stage has a specific ciliary pattern. Hence, we used external ciliation as a marker for the relative staging of *D.*

*vorticooides* and *D. gyrociliatus* development.

The first cilia are visualized soon after stomodeum emergence when the gastrula stage can be distinguished in both species. These cilia appear in the episphere and constitute a prototroch (Fig. 1 A). The prototroch represents a circular ciliary band growing from above the stomodeum

toward the dorsal side; since the left and right branches of the prototroch do not reach each other on the dorsal side, the prototroch remains open there.

When the prototroch has been developed, the ventral ciliary field appears along the midline of the ventral hyposphere beneath the mouth opening. The ventral ciliary field elongates in the anterior-to-posterior direction (Fig. 1 B) and becomes broader and bushier during further development; its cilia become longer.

When the ventral ciliary field has been established, transversal ciliary bands start to grow. One ciliary band, called the acrotroch, appears in the episphere above the prototroch. Like the prototroch, the acrotroch extends to the dorsal side and forms an incomplete ring around the episphere open on the dorsal side. Other ciliary bands emerge in the hyposphere, i.e. under the prototroch. Initially, they look like paired narrow ciliated strip-shaped regions on both sides of the ventral ciliary field. During further development, the ciliary bands become broader and longer as they extend to the dorsal side, where they fuse, forming ring-shaped ciliary bands around the hyposphere (Fig. 1 C). The number of the ciliary bands increases in the anterior-to-posterior direction, reaching five by the moment of hatching (Fig. 1 C).

*D. gyrociliatus* and *D. vorticoides* are direct developers and hatch as the small young juvenile worm. Nevertheless, the stages inside the egg capsule are similar to those that pass the free-swimming larvae of other Lophotrochozoa. The characteristic ciliated structures such as prototroch and ventral ciliary field consequently appear in the course of both dinopholid species' development. Prototroch is the main characteristic of a typical trochophore according to Rouse and Nielsen's definition (Rouse, 1999, 2000). Based on the spatio-temporal ciliation pattern, we suggest the following postgastrulation developmental stages in *D. vorticoides* and *D. gyrociliatus*: early trochophore, middle trochophore and late trochophore (Fig. 1 A-C).

Antibodies against acetylated  $\alpha$ -tubulin mark most neuronal cell bodies and their growing fibers. Cross-staining with antibodies against acetylated  $\alpha$ -tubulin and the neurotransmitters serotonin and FMRFamide provides a visualization of specific neurons and their processes. We provide a description of the neuronal pattern in two Dinophiliformia species at each defined developmental stage.

### **Neurogenesis during the early trochophore stage**

In *D. gyrociliatus* and *D. vorticoides*, the first specific elements expressing a positive reaction to anti-tubulin antibodies occurred during the early trochophore stage. In both species, the first cells demonstrate neither 5-HT- nor FMRFa- immunoreactivity (Fig. 2), so the structures described at this stage are only detected with anti-tubulin antibodies.

In *D. gyrociliatus*, the early trochophore stage passes relatively fast and lasts for just one day (during the second day after oviposition). So, during this period, the visualized structures vary significantly in different samples. Therefore, the sequence of neurogenesis was defined only after the analysis of a large number of samples.

In *D. gyrociliatus*, the first cell appears at the periphery on the ventral side in the episphere, right above the mouth (Fig. 2 A). This early anterior cell has two symmetrical basal processes which grow laterally towards the prototroch (Fig. 2 A). Nuclear staining confirms that the positive immunoreaction occurs in the body of the single solitary anterior cell but not in the neighboring cells (Fig. 2 D).

By the end of the early trochophore stage, a pair of protonephridia develop in the episphere and are clearly visible as tubulin-positive structures in addition to tubulin-positive fibers of early cells (Fig. 2 B, *double arrowheads*). The processes of the early anterior cell extend further in the posterior direction, following the curvature of the developing specimen, and form the anlagen of

the lateral and ventral bundles (Fig. 2 B). Growth cones are visible at the end of the left and right ventral growing fibers. Some of the posterior processes grow towards each other, cross midline, and form the first commissure (Fig. 2 B). In addition to the anterior cell, two symmetrically located cells emerge on the left and right sides of the stomodeum (Fig. 2 B). Anteriorly oriented branches of anterior and lateral cells bend towards each other and form the brain neuropile (Fig. 2 B). Nuclear staining confirms that no additional cell bodies with positive immunoreaction occur in the anterior region or laterally to the stomodeum (Fig. 2 E, F, F').

No 5-HT-IR and FMRFa-IR elements were detected by the end of the early trochophore stage (Fig. 2 C).

In *D. vorticoides*, the early trochophore stage lasts 3 days (5-7 days after oviposition). Two tubulin-positive cells are distinguished on the anterior and posterior poles simultaneously on the fifth day. The anterior cell is located ventrally, while the posterior cell occupies the dorsal side of the hyosphere (Fig. 2 G). Basal processes of the anterior cell organize the anlage of the brain neuropile, while basal processes of the posterior cell do not go far from the cell body (Fig. 2 L). Nuclear staining confirms that the positive signal occurs in the body of the anterior solitary cell but not in the neighboring cells (Fig. 2 J).

By the end of the sixth day, the body of the anterior cell is no longer visible in the episphere (Fig. 2 H). Despite the disappearance of the positive reaction in the early anterior cell, the tubulin-positive fibers organize the compact brain neuropile, ventral bundles, and first and second commissures (Fig. 2 H). Two cells are located symmetrically at the base of the first and second commissures, and their processes join the ipsilateral ventral nerve bundle (Fig. 2 H, K). The posterior cell is not visible from the ventral side because it is displaced more dorsally following the curved posterior region of the trochophore (Fig. 2 H). However, the tubulin-positive cell



body and its two short lateral processes can be seen on the dorsal side. Nuclear staining confirms that the positive signal occurs in the body of the anterior solitary cell but not in the neighboring cells (Fig. 2 M). No 5-HT-IR and FMRFa-IR elements were detected (Fig. 2 I).

### **Neurogenesis during the middle trochophore stage**

The first specific 5-HT-IR and FMRFa-IR cells are detected at the middle trochophore stage in *D. gyrociliatus*. While only specific 5-HT-IR cells are detected in *D. vorticoides*. Note that the 5-HT-IR and FMRFa-IR processes from those cells constitute only a minor portion of the neural structures visualized with a pan-neural marker acetylated  $\alpha$ -tubulin.

In *D. gyrociliatus*, tubulin-positive processes form a dense brain neuropile, paired ventral and lateral bundles, and unpaired medial bundle; two commissures connect ventral bundles; solitary thick processes run from the brain to the anterior region of the body (Fig. 3 A, B). The early anterior cell remains in its position ventrally above the mouth. A single cell starts to express tubulin-positive immunoreactivity at the dorsal posterior region of the body; thus, it is not visible from the ventral side (Fig. 3 C, D). However, a single tubulin-positive body of posterior cell can be distinguished among the tubulin-negative neighboring cells on the dorsal side (Fig. 3 F).

Neither anterior nor posterior cells demonstrate a positive reaction to serotonin.

The first positive 5-HT immunoreaction occur in three cells located symmetrically at the left and right sides at the base of the first commissure (Fig. 3 B, C, D). Their long basal processes join the first commissure and the ventral bundles going posteriorly and anteriorly to the brain neuropile (Fig. 3 B, C, D). Nuclear staining confirms that each 5-HT-IR element represents a solitary cell – thus, two groups of three cells are located at the base of the commissure (Fig. 3 D, E, E').

*D. vorticoides* demonstrate a similar pattern of tubulin-positive structures as *D. gyrocoliatatus* with the exception of unpaired medial and paired lateral bundles while possessing more dense brain neuropile and one additional commissure (Fig. 3 G, L). Note the absence of tubulin-positive bodies in the anterior region, while thick processes extending from the neuropile are clearly visible (Fig. 3 K). The posterior cell is present on the dorsal side and demonstrates no positive reaction with 5-HT (Fig. 3 N).

The first 5-HT-IR cells are found as groups of two cells located at the base of first commissure and solitary cells located at the base of second commissure (Fig. 3 H, I, L). Nuclear staining confirms that the 5-HT-IR element at the base of the commissure represents a solitary cell (Fig. 3 M).

FMRFa-positive elements occurred at the middle trochophore of *D. gyrocoliatatus* but not in *D. vorticoides*. Staining was confined to the body and processes of the early anterior cell, visible at the previous stage after anti-tubulin staining (Fig. 4 A). Specific staining allows us to visualize the processes of the early anterior cell among the tubulin-positive fibers. Numerous long processes extend basally from the cell body and run along with the paired ventral and lateral and unpaired medial bundles (Fig. 4 B). The lateral basal processes of the early anterior cell first enter the brain neuropile, then go along the prototroch to the middle line of the embryo, then turn in the posterior direction and follow the lateral bundles (Fig. 4 C). The short apical process runs toward the anterior surface (Fig. 4 D', E) and bears two long cilia (Fig. 4 E, F). Nuclear staining confirms that only early anterior cells express positive FMRFa reaction in the anterior region (Fig. 4 D, E; Fig. 5).

### **Neurogenesis during the late trochophore stage**

The specific 5-HT-IR and FMRFa-IR cells and their processes are detected at the late trochophore stage in both *D. gyrocoliatius* and *D. vorticoides*. Still, 5-HT-IR and FMRFa-IR processes extending from those cells constitute only a minor proportion of the structures visualized with a pan-neural marker acetylated  $\alpha$ -tubulin. Contrary to *D. gyrocoliatius* FMRFa-IR cells appear in *D. vorticoides* at late trochophore stage only.

In *D. gyrocoliatius*, tubulin-positive processes become more prominent. They constitute a dense brain neuropile, paired ventral and lateral bundles, and unpaired medial bundle; two commissures connect ventral bundles; solitary thick processes run from the brain to the anterior region of the body (Fig. 6 A). The early anterior cell remains its position above the mouth. This cell bears a thin process running to the surface (Fig. 6 D). Nuclear staining confirms that the positive immunoreaction occurs in the body of the single solitary anterior cell but not in the neighboring cells (Fig. 6 D). A single posterior cell is present in the dorsal posterior region of the body (Fig. 6 F). Neither anterior nor posterior cells demonstrate a positive reaction to serotonin. The first positive 5-HT immunoreaction occurred in four cells located symmetrically at the left and right sides above the brain neuropile (Fig. 6 C). Their long basal processes join the brain neuropile and follow the ventral bundles (Fig. 6 B, C, D). Two groups of 5-HT-IR cells at the base of first commissure become more prominent. Their processes are visible in the paired ventral and unpaired medial bundles (Fig. 6 E).

*D. vorticoides* demonstrates a similar pattern of tubulin-positive structures as *D. gyrocoliatius* (Fig. 6 G). Note the absence of tubulin-positive bodies in the anterior region, while thick processes extending from the neuropile are clearly visible (Fig. 6 J). The posterior cell is present on the dorsal side and demonstrates no positive reaction with 5-HT (Fig. 6 M).

First 5-HT-IR cells found above the brain neuropile as two- four solitary cells ( Fig. 6 H, I).

Nuclear staining confirms that the 5-HT-IR elements under the brain neuropile represent separate cells (Fig. 6 K). 5-HT-IR elements at the level of commissures become more prominent as well as paired ventral and unpaired medial bundle (Fig. 6 H, I, K). Nuclear staining confirms that each 5-HT-IR element represents a solitary cell (Fig. 6 K, L).

Solitary anterior FMRFa-IR cell and their processes in *D. gyrocoliatius* become more prominent by late trochophore stage (Fig. 7 A- C, F). The early anterior cell demonstrates FMRFa-IR and its multiple processes can be visible in main nerve structures: the brain neuropile, paired ventral and lateral and unpaired medial bundles (Fig. 7 B, C, F). The early anterior cell has short surface directed process (Fig. 7 D, E). Nuclear staining confirms that only early anterior cells express positive FMRFa reaction in the anterior region (Fig. 7 D, E).

First FMRFa-IR elements appear at the late trochophore stage in *D. vorticoides* above the brain neuropile (Fig. 7 H, I). Nuclear staining confirms two solitary cells at the beginning of the late trochophore stage (Fig. 7 H, J); an additional third cell is visible a bit later (Fig. 7 I, K). One more solitary FMRFa-IR element appears at the level of intestine (Fig. 7 I). Nuclear staining confirms that this element represents a cell (Fig. 7 L). Note that intestine cell and the posterior cell are different, because the posterior cell does not express FMRFa at this stage (Fig. 7 M).

### **The early anterior cell in *D.gyrocoliatius* is present throughout the whole lifespan**

The anterior FMRFa-IR cell in *D. gyrocoliatius* is detected through the early, middle, and late trochophore stages, juvenile, adult, and even senior stages (Fig. 8 A- G). It is an unpaired cell located medially in front of the brain (Fig. 8 D). This cell retains its position and morphology at all the aforementioned stages, including adult and senior (Fig. 8 F-F", G-G"). The cell body is 1.5 times bigger ( $20\pm 3$   $\mu\text{m}$  in diameter,  $n=120$ ) and can be easily distinguished among the other

FMRFa-IR neighboring cells at senior stage (Fig. 8 G, G', G"). Prominent short thick apical processes protrude from the body surface and bear cilia at the anterior tip (Fig. 8 A'-C', A"-C"). The thin basal FMRFa-IR processes of this early anterior cell are visible among the dense brain neuropile (Fig. 8 C, C", D). Multiple basal processes can be followed in the prototroch nerve, ventral and lateral bundles (Fig. 8 D).

It is worth repeating that in *D. vorticoides*, the anterior cell degenerates by the end of the early trochophore stage and never expresses FMRFa-IR or 5-HT-IR.

### **Detailed structure of the Dinophiliformia apical region**

We incubated *D. vorticoides* in 5-HT and 5-HTP to test whether the apical cells are able to uptake serotonin or synthesize it from the immediate biochemical precursor. This feature is typical for cells belonging to the apical sensory organ (ASO) of most studied Lophotrochozoa.

In normal conditions, several flask-shaped cells are visible at the middle trochophore stage with anti-tubulin antibodies at the anterior region of *D. vorticoides* (Fig. 9 B). Upon short-term incubation (3 hours) in 5-HT ( $10^{-5}$  M) and 5-HTP ( $10^{-5}$  M), two of these tubulin-positive cells start to express positive 5-HT-IR (Fig. 9 B', B"). These paired cells are detected in the top anterior region, and the long basal process joins the brain neuropile (Fig. 9 B', B"). This experiment indicates the ability of certain apical cells to uptake exogenous serotonin as well as to convert 5-HTP to 5-HT. Note that cells with such a feature were detected at neither the early trochophore stage (Fig. 9 A, A', A") nor later in the course of ontogenesis: late trochophore (Fig. 9 C, C', C"), in pre-hatching (Fig. 9 D-D"), juvenile (Fig. 9 E-E"), and adults (Fig. 9 F-F"), while distinct 5-HT-IR occurred within cell bodies adjacent to the brain neuropile (Fig. 9 C-C') as well as within the brain neuropile and in the main neuronal bundles (Fig. 9 C-F, C'-F')

Numerous epithelial cells with short sensory processes become 5-HT-IR in free-living pre-hatching, juvenile and adult *D. vorticoides* after short-term incubation in 5-HTP but not 5-HT (Fig. 9 D", E", F"). Bunches of cilia are visible at the tip of anterior process in each cell (Fig. 9 F"). This experiment demonstrates the presence of decarboxylase aromatic amino acid enzyme but not a serotonin transporter in some sensory epithelial cells.

## Discussion

We provide a detailed analysis of the early neuronal development of *D. gyrotilatus* and *D. vorticoides*. We define three stages of embryonic development in both species and describe their ciliary and nervous structures landmarks (Fig. 10-14).

Since the duration of the embryonic period is different in *D. gyrotilatus* and *D. vorticoides*, we needed to validate the method, allowing to match their developmental stages. We found out that the pattern of differentiation of external ciliary structures is the same in both species: the prototroch appears first, followed by the ventral ciliary field and then by ciliary bands. Thus, these ciliary structures (along with an absolute timescale) can be used as temporal landmarks to compare developmental stages in two Dinophiliformia species with different durations of time they spend inside the egg. An external ciliation pattern was successfully used to define a particular developmental stage in other annelids (*Bergter, Brubacher & Paululat, 2008*).

Although Dinophiliformia develop directly, their early developmental stages are comparable with free-swimming larvae: early, middle and late trochophores. The trochophore is characterized by the presence of the prototroch, a preoral ciliary band (*Rouse, 1999, 2000*).

Dinophiliformia retain this structure throughout their life as a pedomorphic trait (*Kerbl et al., 2017*). A recent analysis of gene expression confirmed the homology of the prototroch in

indirect-developing annelids (*Kempf, Page & Pires, 1997; Kerbl et al., 2016b*) and the prototroch of adult *D. gyrociliatus* (*Kerbl et al., 2017*).

### **Comparative analysis of Dinophiliformia early neurogenesis**

The early neurogenesis in many different lophotrochozoans has been thoroughly studied during the last few decades in order to understand the differentiation, evolution, and physiology of the nervous system in these animals. A considerable amount of this research was performed using a simple and reliable method of the visualization of nervous structures: immunostaining with antibodies to ubiquitously present neuronal markers: acetylated tubulin (pan-neural marker), serotonin (5-HT), and a neuropeptide FMRFamide (*Croll & Voronezhskaya, 1995, 1996; Conzelmann & Jékely, 2012*). We used the same approach in our work in order to gain a picture comparable to other studies.

Dinophiliformia is a sister to Pleistoannelida, uniting Sedentaria and Errantia (*Martín-Durán et al., 2021*). We further discuss the early events in the neurogenesis of Dinophiliformia and compare them to other lophotrochozoan animals within and beyond this clade.

The neurogenesis in both Dinophiliformia begins with the differentiation of two peripheral cells, one anterior and one posterior, emanating from their processes toward each other. This type of localization of the first cells expressing neuronal characters was registered in other annelids from Sedentaria (*Kumar et al., 2020*) and Errantia (*Voronezhskaya, Tsitrin & Nezhlin, 2003; Starunov, Voronezhskaya & Nezhlin, 2017*). Some other representatives of Sedentaria, however, lack a posterior cell (*Brinkmann & Wanninger, 2009; Meyer & Seaver, 2009; Meyer et al., 2015; Carrillo-Baltodano & Meyer, 2017*), suggesting that the number and localization as well as transmitter content of the first cells in annelids can vary.

The processes of the early anterior and posterior cells in both Dinophiliformia run in the area of the prospective central nervous structures and create its general layout: brain neuropile, paired ventral and lateral and unpaired medial longitudinal nerve bundles and several ventral commissures. Nascent neural cells differentiate along the way of these processes. Such a scenario of neural development, when neurogenesis starts from two or more peripheral neurons located on the opposite poles of the larva, was considered ancestral for Pleistoannelida (*Kumar et al., 2020*). Our data on Dinophiliformia support this point of view (Fig. 14) and push back the presence of this type of neurogenesis to the common ancestor of Dinophiliformia and Pleistoannelida. Actually, this pattern of neurogenesis was also registered in other groups, for example, in mollusks (*Redl et al., 2014; Pavlicek, Schwaha & Wanninger, 2018; Battonyai et al., 2018; Yurchenko et al., 2019*), Nemertea (*Hiebert & Maslakova, 2015*), and Platyhelminthes (*Rawlinson, 2010*). This suggests that it might be much more ancient unless it evolved independently in these groups.

The fact that the processes of the early anterior and posterior cells in Dinophiliformia demarcate the layout of the central nervous system may indicate that these cells pioneer the development of the nervous system, although further molecular support is required. Whether these cells are pioneer neurons or not, the fact that they lack 5HT/FMRFa immunoreactivity set Dinophiliformia apart from many other Lophotrochozoa from distant groups, where the first neurons to differentiate are either 5HT or FMRFa immunoreactive. Representatives of different annelid groups (Oweniidae, Sedentaria, Errantia) show immunoreactivity to 5HT or FMRFa or both in their early anterior and posterior cells (*Nedved, 2010, McDougall et al., 2006, Starunov, Voronezhskaya & Nezhlin, 2017, Voronezhskaya, Tsitrin & Nezhlin, 2003*). Non-annelid Lophotrochozoa (mollusks) demonstrate FMRFa immunoreactivity in the presumable pioneer



neurons (*Voronezhskaya et al., 1999; Dickinson, Croll & Voronezhskaya, 2000*). Aside from this, 5HT or FMRFa immunoreactivity was detected in the first neural cells, associated with different structures and functions, in nemerteans (*Chernyshev & Magarlamov, 2010; Von Döhren, 2016*), flatworms (*Rawlinson, 2010*), mollusks (*Dyachuk & Odintsova, 2009; Pavlicek, Schwaha & Wanninger, 2018; Battonyai et al., 2018; Yurchenko et al., 2019*), phoronids (*Hay-Schmidt, 1990*), and brachiopods (*Altenburger & Wanninger, 2010*). The ubiquitous presence of 5HT or FMRFa immunoreactive early neurons in Lophotrochozoa suggests that it is likely to be an ancestral state. However, there are a few exceptions: a sedentarian annelid *M. fuliginosus* (*Kumar et al., 2020*), and some mollusks (*Redl et al., 2014*) possess the early neuron with other (still unidentified) transmitter phenotypes. Certainly, the first neurons do not have 5HT and FMRFa immunoreactivity in these animals. Thus, the absence of 5HT and FMRFa immunoreactivity in the first neurons is not unique for the early stages of Dinophiliformia but is apparently rare for annelids as well as other lophotrochozoans, and may suggest a derived state of early neurogenesis. Further research is needed to identify signaling molecules expressing in the early cells of Dinophiliformia.

### **The anterior cell in *D. gyrociliatus* is a particular case**

The first neurons of Lophotrochozoa, which could be either pioneer neurons or sensory cells of the apical organ or other cells with an unknown function, are known to be transient as they disappear by the end of larval development (*Voronezhskaya & Ivashkin, 2010; Nezhlin & Voronezhskaya, 2017*). Although it was shown in *D. vorticoides*, the anterior and posterior early cells in *D. gyrociliatus* are retained throughout the whole life of the species. At the early stage, these cells are detected with anti-tubulin antibodies; later on, they begin to express FMRFa immunoreactivity. The early anterior cell of *D. gyrociliatus* has a short apical neurite and several

cilia and thus can be considered a sensory cell. In addition, this cell sends long basal processes to the brain neuropile, the prototroch circular nerve, and the ventral, medial, and lateral cords. It does not seem to be homologous to the anterior cell of *D. vorticoides*, which does not have FMRFa immunoreactivity and is not sensory since it has no surface extensions. The fact that the early anterior and posterior cells of *D. gyrociliatus* are present throughout the entire lifespan may be interpreted as a pedomorphic trait in *D. gyrociliatus*, related to its progenetic origin (Kerbl *et al.*, 2016a).

The FMRFa-immunoreactive cells with similar location and/or time of appearance have been registered in close relatives of Dinophiliformia, *C. teleta* (Sedentaria) (Meyer & Seaver, 2009; Meyer *et al.*, 2015; Carrillo-Baltodano & Meyer, 2017), *P. maculata* (Errantia) (Voronezhskaya, Tsitrin & Nezhlin, 2003), and *P. agassizii* (Sipunculida) (Kristof, Wollesen & Wanninger, 2008). It has not been registered in other annelids and other Lophotrochozoa groups. Although these FMRFa-immunoreactive cells are not the first to differentiate in the aforementioned species, it is plausible that they are homologous to FMRFa-immunoreactive cell in *D. gyrociliatus*. Therefore, this cell might be a synapomorphy of a clade Pleistoannelida + Dinophiliformia + Sipuncula (Fig. 14).

### **Where is the apical organ?**

The apical organ is a conservative neural structure developing early during the neurogenesis of lophotrochozoan larvae. It is a group of sensory FMRFamide- or 5-HT-immunoreactive cells, located adjacent to cerebral commissure and transient in appearance. The apical organ is thought to have been present in the common ancestor of Lophotrochozoa (Nielsen, 2005; Wanninger, 2008; Marlow *et al.*, 2014) or even the common ancestor of Cnidaria and Bilateria (Marlow *et al.*, 2014), and thus represents a plesiomorphic state in these animals. Our study on

Dinophiliformia revealed no cells which could be assigned to the apical organ by their expression of 5-HT or FMRFamide immunoreactivity. However, anti-tubulin antibodies revealed sensory flask-shaped cells in an anterior region of embryos of *D. gyrocoliatius* and *D. vorticoides*. The pharmacological approach showed that two of these cells could uptake 5-HT and synthesize it from the precursor during the limited period of neurogenesis. This result indicates that these cells have the transient expression of enzymes necessary for serotonin synthesis and transporters using for 5-HT uptake, and could thus be a remnant of an ASO cells. Therefore, the apical organ of Dinophiliformia was either significantly reduced or switched to the use of other signaling molecules, for example, other than FMRFamide neuropeptides, a wide variety of which are highly expressed in the brain of adult Dinophiliformia (Kerbl *et al.*, 2017) and present in the apical sensory cells of other annelids (Kerbl *et al.*, 2017). Both scenarios could result from Dinophiliformia evolution, which included simplification, miniaturization, paedomorphosis, and switch to direct development (Westheide, 1987; Hanken & Wake, 1993; Müller & Westheide, 2002; Kerbl *et al.*, 2016a,b).

Free-swimming annelid larvae usually have a prominent apical organ (Voronezhskaya, Tsitrin & Nezhlin, 2003; McDougall *et al.*, 2006; Starunov, Voronezhskaya & Nezhlin, 2017; Kumar *et al.*, 2020; Carrillo-Baltodano *et al.*, 2021). However, it was suggested to be reduced in a sedentarian *C. teleta* (Meyer & Seaver, 2009; Meyer *et al.*, 2015; Carrillo-Baltodano & Meyer, 2017). Given that the trochophores of another sedentarian (Kumar *et al.*, 2020) and Errantia (Voronezhskaya, Tsitrin & Nezhlin, 2003; Starunov, Voronezhskaya & Nezhlin, 2017) do have the apical organ, we speculate that the reduction of the apical organ in *C. teleta* and Dinophiliformia represents independent evolutionary events.

## Conclusions

We revealed that the development of the nervous system in Dinophiliformia starts from two neural cells located at the opposite poles of the body and probably serve as pioneer neurons. This pattern of early neurogenesis is comparable to that of most representatives of Pleistoannelida and perhaps represents a synapomorphy of a clade Dinophiliformia + Pleistoannelida. However, Dinophiliformia has a few distinctions from most Pleistoannelida and other Lophotrochozoa in that their early anterior and posterior cells lack 5-HT or FMRFa immunoreactivity and the apical organ is reduced or simplified. Although Dinophiliformia share these characteristics with a few representatives of Pleistoannelida, we hypothesize that they evolved independently during the paedomorphic evolution of this group. We suggest that FMRFa immunopositive anterior cell is a synapomorphy for a clade Pleistoannelida + Dinophiliformia + Sipuncula. The fact that *D. gyrociliatus*, unlike *D. vorticoides*, retains this neuron through the lifespan probably reflects an extreme degree of paedomorphosis of this species.

These data add to our knowledge of how variable the early development in Annelida and Spiralia could be and to what extent evolutionary changes might affect such a conservative process as early neurogenesis.

## **Acknowledgements**

The research was done using the equipment of the Core Centrum of the Institute of Developmental Biology RAS. Light microscopy study was conducted using equipment of the Center of microscopy WSBS MSU. We thank the anonymous native speakers from the Flarus and MDPI agencies for the professional language proofreading. The reported study was funded by the Russian Foundation for Basic Research, grant # 19-34-60040. The work was conducted under IDB RAS GBRP # 0088-2021-0020.

## **References**

- Altenburger A, Wanninger A. 2010. Neuromuscular development in *Novocrania anomala*: evidence for the presence of serotonin and a spiralian-like apical organ in lecithotrophic brachiopod larvae. *Evolution & Development* 12:16–24. DOI: 10.1111/j.1525-142X.2009.00387.x.
- Battonyai I, Voronezhskaya EE, Obukhova A, Horváth R, Nezhlin LP, Elekes K. 2018. Neuronal Development in the Larvae of the Invasive Biofouler *Dreissena polymorpha* (Mollusca: Bivalvia), with Special Attention to Sensory Elements and Swimming Behavior. *The Biological Bulletin* 234:192–206. DOI: 10.1086/698511.
- Beklemishev VN, Kabata Z. 1969. *Principles of comparative anatomy of invertebrates*. Edinburgh: Oliver & Boyd.
- Bergter A, Brubacher JL, Paululat A. 2008. Muscle formation during embryogenesis of the polychaete *Ophryotrocha diadema* (Dorvilleidae) – new insights into annelid muscle patterns. *Frontiers in Zoology* 5:1. DOI: 10.1186/1742-9994-5-1.
- Boaden PJS. 1989. Meiofauna and the origins of the Metazoa. *Zoological Journal of the Linnean Society* 96:217–227. DOI: 10.1111/j.1096-3642.1989.tb02257.x.
- Brinkmann N, Wanninger A. 2009. Neurogenesis suggests independent evolution of opercula in serpulid polychaetes. *BMC Evolutionary Biology* 9:270. DOI: 10.1186/1471-2148-9-270.
- Carrillo-Baltodano AM, Boyle MJ, Rice ME, Meyer NP. 2019. Developmental architecture of the nervous system in *Themiste lageniformis* (Sipuncula): New evidence from confocal laser scanning microscopy and gene expression. *Journal of Morphology* 280:1628–1650. DOI: 10.1002/jmor.21054.

- Carrillo-Baltodano AM, Meyer NP. 2017. Decoupling brain from nerve cord development in the annelid *Capitella teleta*: Insights into the evolution of nervous systems. *Developmental Biology* 431:134–144. DOI: 10.1016/j.ydbio.2017.09.022.
- Carrillo-Baltodano AM, Seudre O, Guynes K, Martín-Durán JM. 2021. Early embryogenesis and organogenesis in the annelid *Owenia fusiformis*. *EvoDevo* 12:5. DOI: 10.1186/s13227-021-00176-z.
- Chernyshev AV, Magarlamov TYu. 2010. The first data on the nervous system of hoplonemertean larvae (Nemertea, Hoplonemertea). *Doklady Biological Sciences* 430:48–50. DOI: 10.1134/S0012496610010163.
- Conzelmann M, Jékely G. 2012. Antibodies against conserved amidated neuropeptide epitopes enrich the comparative neurobiology toolbox. *EvoDevo* 3:23. DOI: 10.1186/2041-9139-3-23.
- Croll RP, Voronezhskaya EE. 1995. Early FMRFamide-like immunoreactive cells in gastropod neurogenesis. *Acta Biologica Hungarica* 46:295–303.
- Croll RP, Voronezhskaya EE. 1996. Early Elements in Gastropod Neurogenesis. *Developmental Biology* 173:344–347. DOI: 10.1006/dbio.1996.0028.
- Dickinson AJG, Croll RP. 2003. Development of the larval nervous system of the gastropod *Ilyanassa obsoleta*. *The Journal of Comparative Neurology* 466:197–218. DOI: 10.1002/cne.10863.
- Dickinson A, Croll R, Voronezhskaya E. 2000. Development of embryonic cells containing serotonin, catecholamines, and FMRFamide-related peptides in *Aplysia californica*. *The Biological Bulletin* 199:305–315. DOI: 10.2307/1543187.

- Von Döhren J. 2016. Development of the Nervous System of *Carinina ochracea* (Palaeonemertea, Nemertea). *PLOS ONE* 11:e0165649. DOI: 10.1371/journal.pone.0165649.
- Dyachuk V, Odintsova N. 2009. Development of the larval muscle system in the mussel *Mytilus trossulus* (Mollusca, Bivalvia): Myo-anatomy of bivalve larvae. *Development, Growth & Differentiation* 51:69–79. DOI: 10.1111/j.1440-169X.2008.01081.x.
- Fischer AH, Henrich T, Arendt D. 2010. The normal development of *Platynereis dumerilii* (Nereididae, Annelida). *Frontiers in Zoology* 7:31. DOI: 10.1186/1742-9994-7-31.
- Fofanova EG, Nezhlin LP, Voronezhskaya EE. 2014. Ciliary and nervous structures in juvenile females of the annelid *Dinophilus gyrotilatus* (O. Schmidt, 1848) (Annelida: Polychaeta). *Russian Journal of Marine Biology* 40:43–52. DOI: 10.1134/S1063074014010040.
- Fofanova E, Voronezhskaya E. 2012. The structure of Archiannelid *Dinophilus gyrotilatus* ventral nerve cords. *Acta Biologica Hungarica* 63:88–90. DOI: 10.1556/ABiol.63.2012.Suppl.2.11.
- Hanken J, Wake DB. 1993. Miniaturization of Body Size: Organismal Consequences and Evolutionary Significance. *Annual Review of Ecology and Systematics* 24:501–519. DOI: 10.1146/annurev.es.24.110193.002441.
- Hay-Schmidt A. 1990. Distribution of catecholamine-containing, serotonin-like and neuropeptide FMRFamide-like immunoreactive neurons and processes in the nervous system of the actinotroch larva of *Phoronis muelleri* (Phoronida). *Cell and Tissue Research* 259:105–118. DOI: 10.1007/BF00571435.
- Hejnol A, Lowe CJ. 2015. Embracing the comparative approach: how robust phylogenies and broader developmental sampling impacts the understanding of nervous system evolution.

*Philosophical Transactions of the Royal Society B: Biological Sciences* 370:20150045.

DOI: 10.1098/rstb.2015.0045.

Hiebert LS, Maslakova SA. 2015. Expression of Hox, Cdx, and Six3/6 genes in the hoplonemertean *Pantionemertes californiensis* offers insight into the evolution of maximally indirect development in the phylum Nemertea. *EvoDevo* 6:26. DOI: 10.1186/s13227-015-0021-7.

Kempf SC, Page LR, Pires A. 1997. Development of serotonin-like immunoreactivity in the embryos and larvae of nudibranch mollusks with emphasis on the structure and possible function of the apical sensory organ. *The Journal of Comparative Neurology* 386:507–528. DOI: 10.1002/(sici)1096-9861(19970929)386:3<507::aid-cne12>3.0.co;2-7.

Kerbl A, Conzelmann M, Jékely G, Worsaae K. 2017. High diversity in neuropeptide immunoreactivity patterns among three closely related species of Dinophilidae (Annelida). *The Journal of Comparative Neurology* 525:3596–3635. DOI: 10.1002/cne.24289.

Kerbl A, Fofanova EG, Mayorova TD, Voronezhskaya EE, Worsaae K. 2016a. Comparison of neuromuscular development in two dinophilid species (Annelida) suggests progenetic origin of *Dinophilus gyrociliatus*. *Frontiers in Zoology* 13:49. DOI: 10.1186/s12983-016-0181-x.

Kerbl A, Martín-Durán JM, Worsaae K, Hejzol A. 2016b. Molecular regionalization in the compact brain of the meiofaunal annelid *Dinophilus gyrociliatus* (Dinophilidae). *EvoDevo* 7:20. DOI: 10.1186/s13227-016-0058-2.

Kristof A, Wollesen T, Wanninger A. 2008. Segmental Mode of Neural Patterning in Sipuncula. *Current Biology* 18:1129–1132. DOI: 10.1016/j.cub.2008.06.066.



- Kumar S, Tumu SC, Helm C, Hausen H. 2020. The development of early pioneer neurons in the annelid *Malacoceros fuliginosus*. *BMC Evolutionary Biology* 20:117. DOI: 10.1186/s12862-020-01680-x.
- Marlow H, Tosches MA, Tomer R, Steinmetz PR, Lauri A, Larsson T, Arendt D. 2014. Larval body patterning and apical organs are conserved in animal evolution. *BMC biology* 12:7. DOI: 10.1186/1741-7007-12-7.
- Martín-Durán JM, Vellutini BC, Marlétaz F, Cetrangolo V, Cvetesic N, Thiel D, Henriët S, Grau-Bové X, Carrillo-Baltodano AM, Gu W, Kerbl A, Marquez Y, Bekkouche N, Chourrout D, Gómez-Skarmeta JL, Irimia M, Lenhard B, Worsaae K, Hejnol A. 2021. Conservative route to genome compaction in a miniature annelid. *Nature Ecology & Evolution* 5:231–242. DOI: 10.1038/s41559-020-01327-6.
- Mauri M, Baraldi E, Simonini R. 2003. Effects of zinc exposure on the polychaete *Dinophilus gyrociliatus*: a life-table response experiment. *Aquatic Toxicology* 65:93–100. DOI: 10.1016/S0166-445X(03)00109-7.
- McDougall C, Chen W-C, Shimeld SM, Ferrier DEK. 2006. The development of the larval nervous system, musculature and ciliary bands of *Pomatoceros lamarckii* (Annelida): heterochrony in polychaetes. *Frontiers in Zoology* 3:16. DOI: 10.1186/1742-9994-3-16.
- Meyer NP, Carrillo-Baltodano A, Moore RE, Seaver EC. 2015. Nervous system development in lecithotrophic larval and juvenile stages of the annelid *Capitella teleta*. *Frontiers in Zoology* 12:15. DOI: 10.1186/s12983-015-0108-y.
- Meyer NP, Seaver EC. 2009. Neurogenesis in an annelid: characterization of brain neural precursors in the polychaete *Capitella sp. I*. *Developmental Biology* 335:237–252. DOI: 10.1016/j.ydbio.2009.06.017.

- Müller MCM, Westheide W. 2002. Comparative analysis of the nervous systems in presumptive progenetic dinophilid and dorvilleid polychaetes (Annelida) by immunohistochemistry and cLSM: Nervous systems in progenetic polychaetes. *Acta Zoologica* 83:33–48. DOI: 10.1046/j.1463-6395.2002.00096.x.
- Nezlin LP. 2010. The golden age of comparative morphology: Laser scanning microscopy and neurogenesis in trochophore animals. *Russian Journal of Developmental Biology* 41:381–390. DOI: 10.1134/S1062360410060056.
- Nezlin LP, Voronezhskaya EE. 2017. Early peripheral sensory neurons in the development of trochozoan animals. *Russian Journal of Developmental Biology* 48:130–143. DOI: 10.1134/S1062360417020060.
- Nielsen C. 2005. Larval and adult brains. *Evolution & Development* 7:483–489. DOI: 10.1111/j.1525-142X.2005.05051.x.
- Pavlicek A, Schwaha T, Wanninger A. 2018. Towards a ground pattern reconstruction of bivalve nervous systems: neurogenesis in the zebra mussel *Dreissena polymorpha*. *Organisms, Diversity & Evolution* 18:101–114. DOI: 10.1007/s13127-017-0356-0.
- Rawlinson KA. 2010. Embryonic and post-embryonic development of the polyclad flatworm *Maritigrella crozieri*; implications for the evolution of spiralian life history traits. *Frontiers in Zoology* 7:12. DOI: 10.1186/1742-9994-7-12.
- Redl E, Scherholz M, Todt C, Wollesen T, Wanninger A. 2014. Development of the nervous system in Solenogastres (Mollusca) reveals putative ancestral spiralian features. *EvoDevo* 5:48. DOI: 10.1186/2041-9139-5-48.
- Richter S, Loesel R, Purschke G, Schmidt-Rhaesa A, Scholtz G, Stach T, Vogt L, Wanninger A, Brenneis G, Döring C, Faller S, Fritsch M, Grobe P, Heuer CM, Kaul S, Møller OS,

- Müller CH, Rieger V, Rothe BH, Stegner ME, Harzsch S. 2010. Invertebrate neurophylogeny: suggested terms and definitions for a neuroanatomical glossary. *Frontiers in Zoology* 7:29. DOI: 10.1186/1742-9994-7-29.
- Rouse GW. 1999. Trochophore concepts: ciliary bands and the evolution of larvae in spiralian Metazoa. *Biological Journal of the Linnean Society* 66:411–464. DOI: 10.1111/j.1095-8312.1999.tb01920.x.
- Rouse GW. 2000. Bias? What bias? The evolution of downstream larval-feeding in animals. *Zoologica Scripta* 29:213–236. DOI: 10.1046/j.1463-6409.2000.00040.x.
- Schmidt-Rhaesa A, Harzsch S, Purschke G. 2015. Structure and Evolution of Invertebrate Nervous Systems. Oxford University Press. DOI: 10.1093/acprof:oso/9780199682201.001.0001.
- Shearer C. 1911. The Problem of Sex Determination in *Dinophilus gyrotilatus*. *Journal of the Marine Biological Association of the United Kingdom* 9:156–160. DOI: 10.1017/S002531540007332X.
- Starunov VV, Voronezhskaya EE, Nezlin LP. 2017. Development of the nervous system in *Platynereis dumerilii* (Nereididae, Annelida). *Frontiers in Zoology* 14:27. DOI: 10.1186/s12983-017-0211-3.
- Voronezhskaya EE, Elekes K. 1996. Transient and sustained expression of FMRamide-like immunoreactivity in the developing nervous system of *Lymnaea stagnalis* (Mollusca, Pulmonata). *Cellular and Molecular Neurobiology* 16:661–676. DOI: 10.1007/BF02151903.

- Voronezhskaya EE, Elekes K. 2003. Expression of FMRamide gene encoded peptides by identified neurons in embryos and juveniles of the pulmonate snail *Lymnaea stagnalis*. *Cell and Tissue Research* 314:297–313. DOI: 10.1007/s00441-003-0800-7.
- Voronezhskaya EE, Hiripi L, Elekes K, Croll RP. 1999. Development of catecholaminergic neurons in the pond snail, *Lymnaea stagnalis*: I. Embryonic development of dopamine-containing neurons and dopamine-dependent behaviors. *The Journal of Comparative Neurology* 404:285–296. DOI: 10.1002/(sici)1096-9861(19990215)404:3<285::aid-cne1>3.0.co;2-s.
- Voronezhskaya E, Ivashkin E. 2010. Pioneer Neurons: A Basis or Limiting Factor of Lophotrochozoa Nervous System Diversity? *Russian Journal of Developmental Biology* 41:337–346. DOI: 10.1134/S1062360410060019.
- Voronezhskaya EE, Tsitrin EB, Nezhlin LP. 2003. Neuronal development in larval polychaete *Phyllodoce maculata* (Phyllodocidae). *The Journal of Comparative Neurology* 455:299–309. DOI: 10.1002/cne.10488.
- Voronezhskaya EE, Tyurin SA, Nezhlin LP. 2002. Neuronal development in larval chiton *Ischnochiton hakodadensis* (Mollusca: Polyplacophora). *Journal of Comparative Neurology* 444:25–38. DOI: <https://doi.org/10.1002/cne.10130>.
- Wanninger A. 2008. Comparative Lophotrochozoan Neurogenesis and Larval Neuroanatomy: Recent Advances from Previously Neglected Taxa. *Acta Biologica Hungarica* 59:127–136. DOI: 10.1556/ABiol.59.2008.Suppl.21.
- Wanninger A, Koop D, Bromham L, Noonan E, Degnan BM. 2005. Nervous and muscle system development in *Phascolion strombus* (Sipuncula). *Development Genes and Evolution* 215:509–518. DOI: 10.1007/s00427-005-0012-0.

Westheide W. 1987. Progenesis as a principle in meiofauna evolution. *Journal of Natural History* 21:843–854. DOI: 10.1080/00222938700770501.

Windoffer R, Westheide W. 1988. The nervous system of the male *Dinophilus gyrotilatus* (Polychaeta, Dinophilidae): II. Electron microscopical reconstruction of nervous anatomy and effector cells. *The Journal of Comparative Neurology* 272:475–488. DOI: 10.1002/cne.902720403.

Worsaae K, Kerbl A, Domenico MD, Gonzalez BC, Bekkouche N, Martínez A. 2021. Interstitial Annelida. *Diversity* 13:77. DOI: 10.3390/d13020077.

Yurchenko OV, Savelieva AV, Kolotuchina NK, Voronezhskaya EE, Dyachuk VA. 2019. Peripheral sensory neurons govern development of the nervous system in bivalve larvae. *EvoDevo* 10:22. DOI: 10.1186/s13227-019-0133-6.

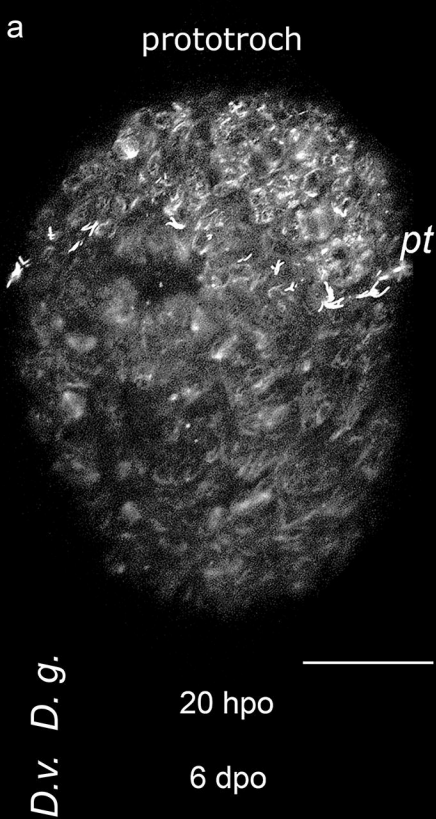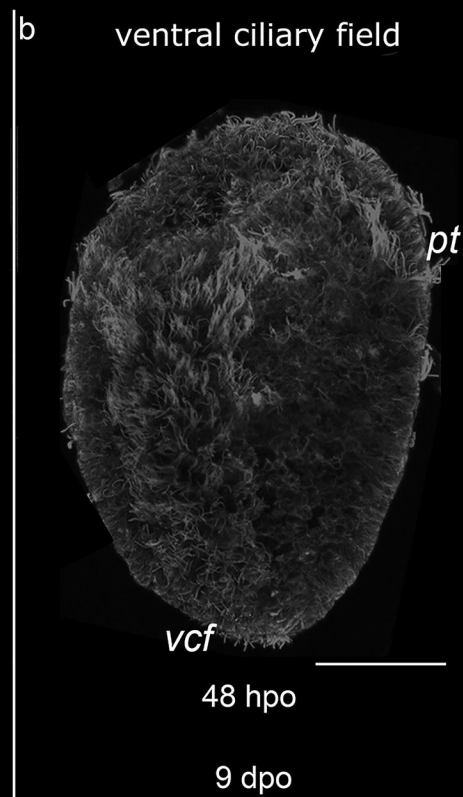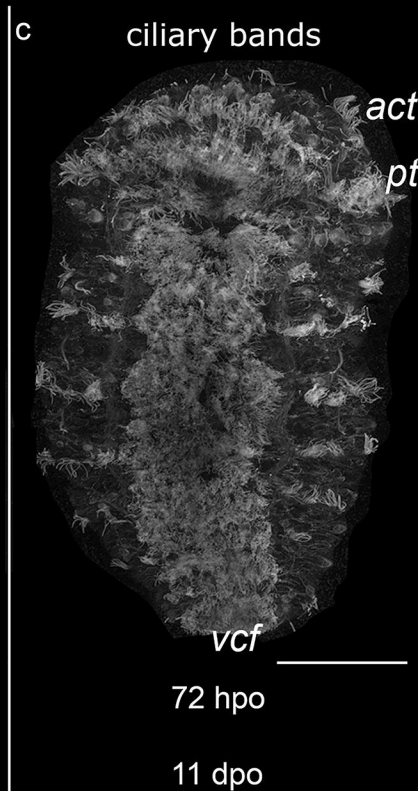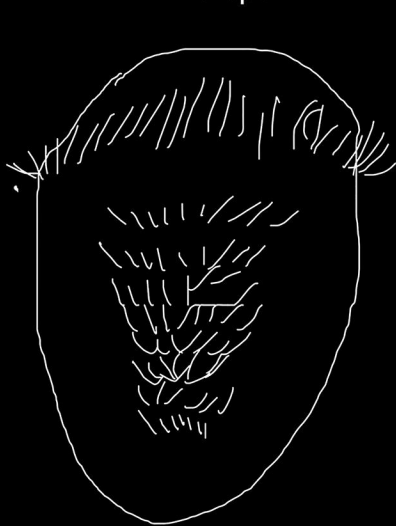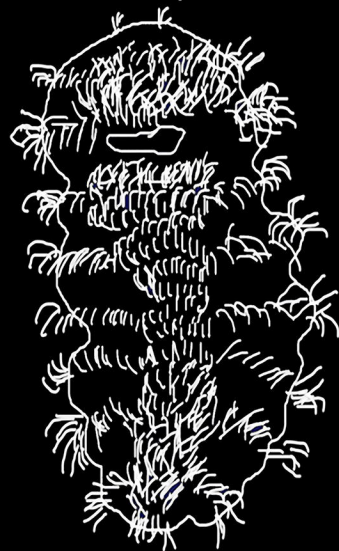



*D. gyrociiliatus* early trochophore

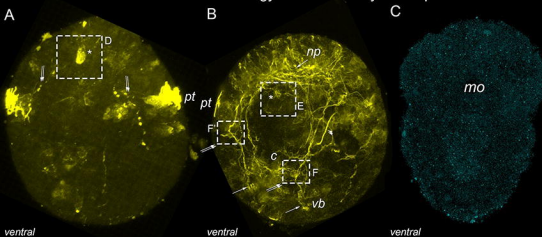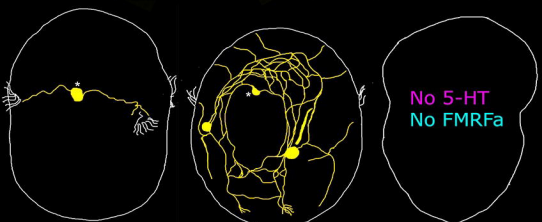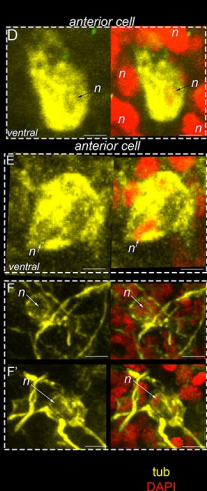

*D. vorticoides*, early trochophore

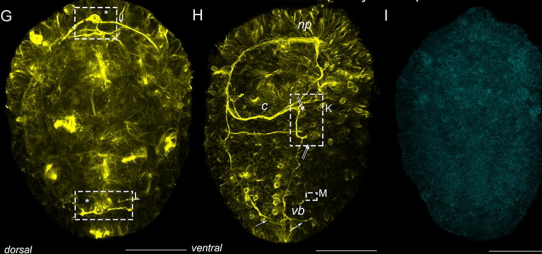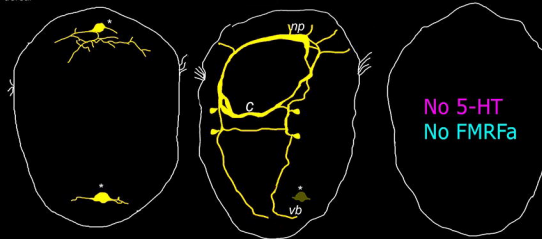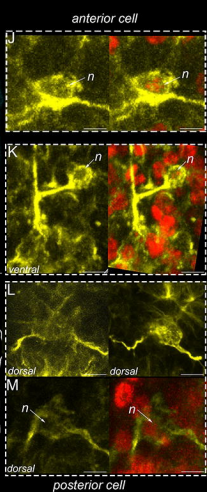



*D. gyrocilatus*, middle trochophore

CC-BY 4.0 International license

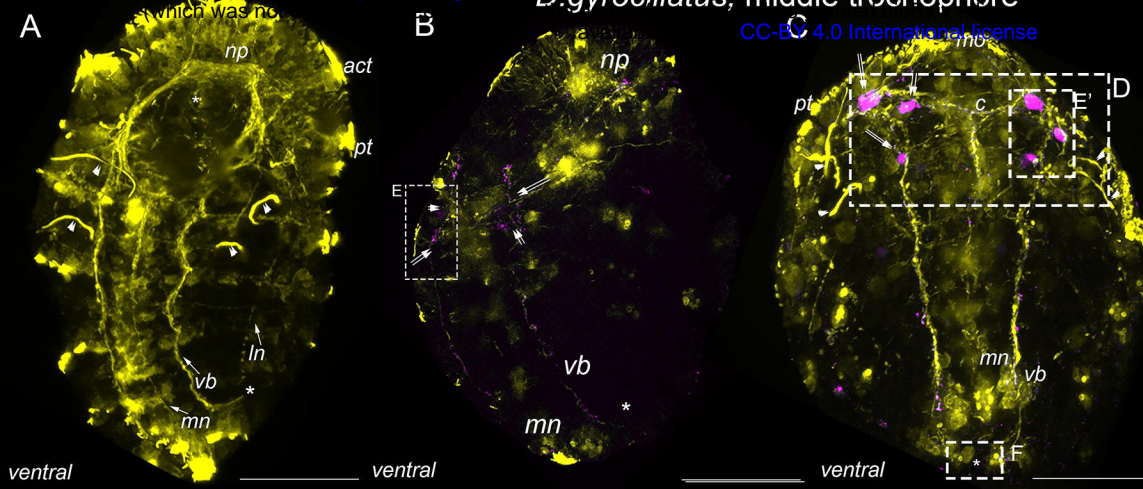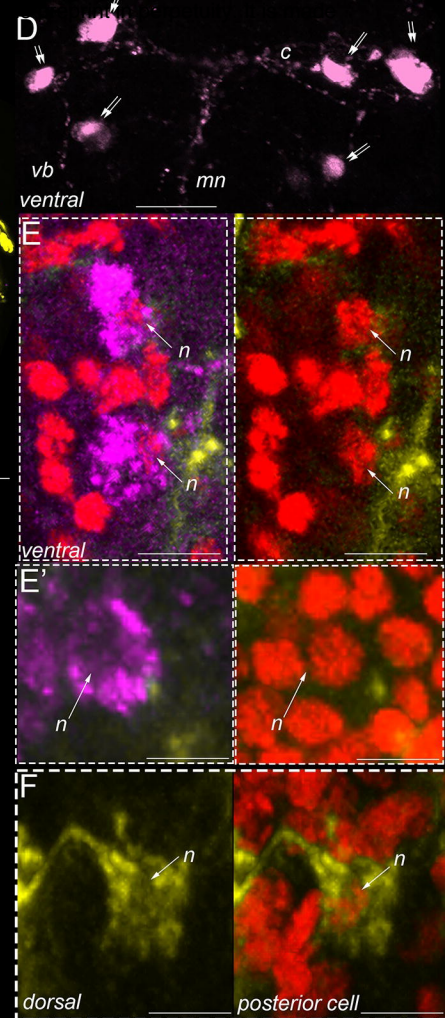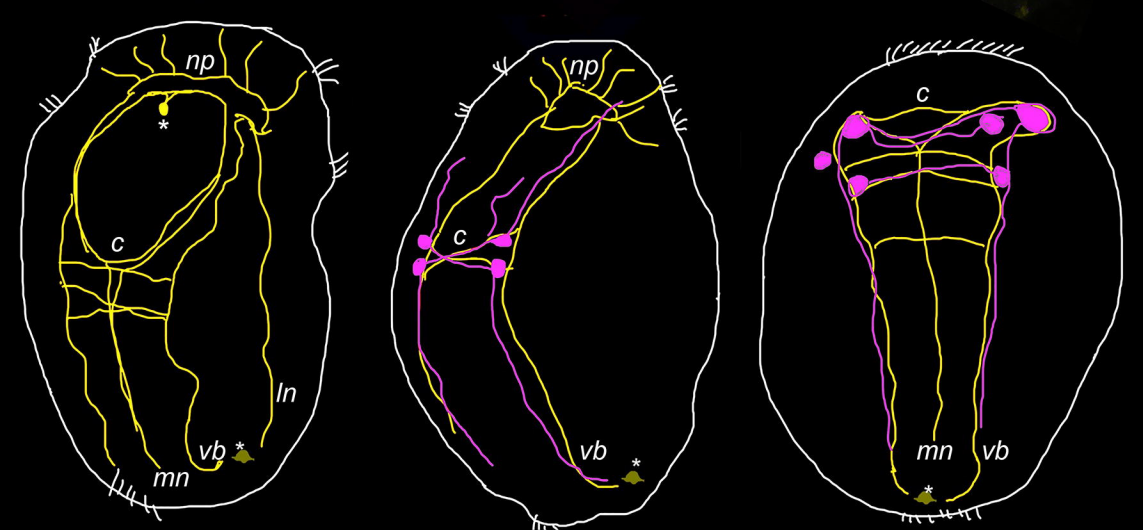

*D. vorticoides*, middle trochophore

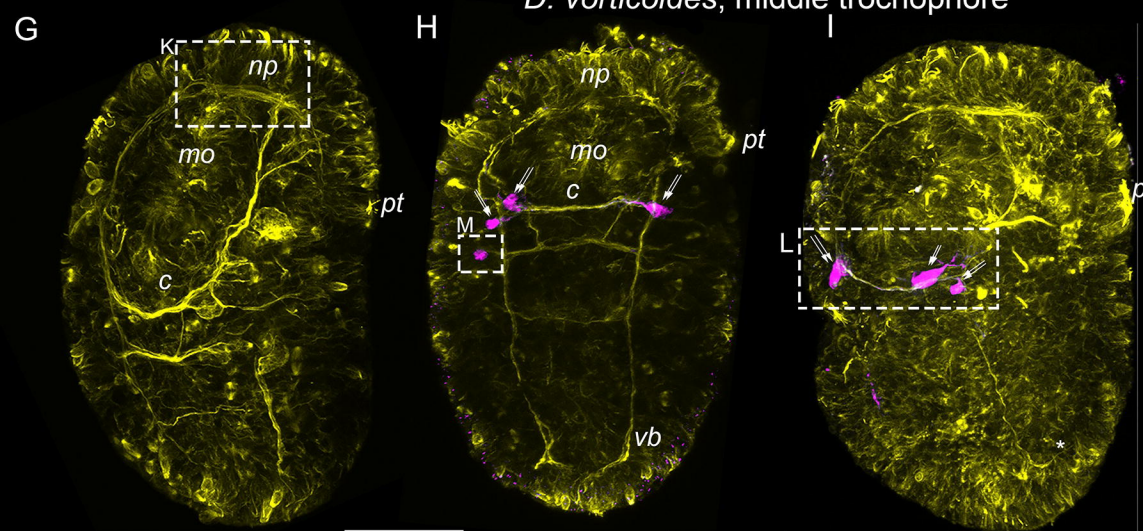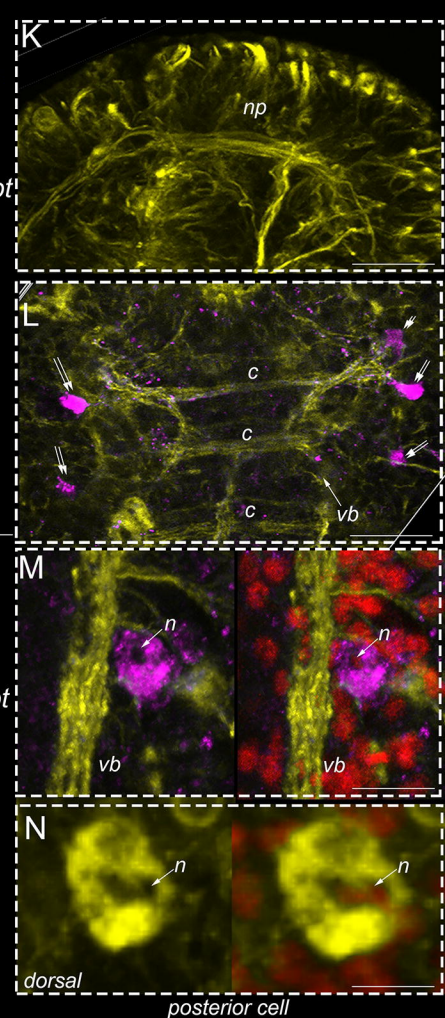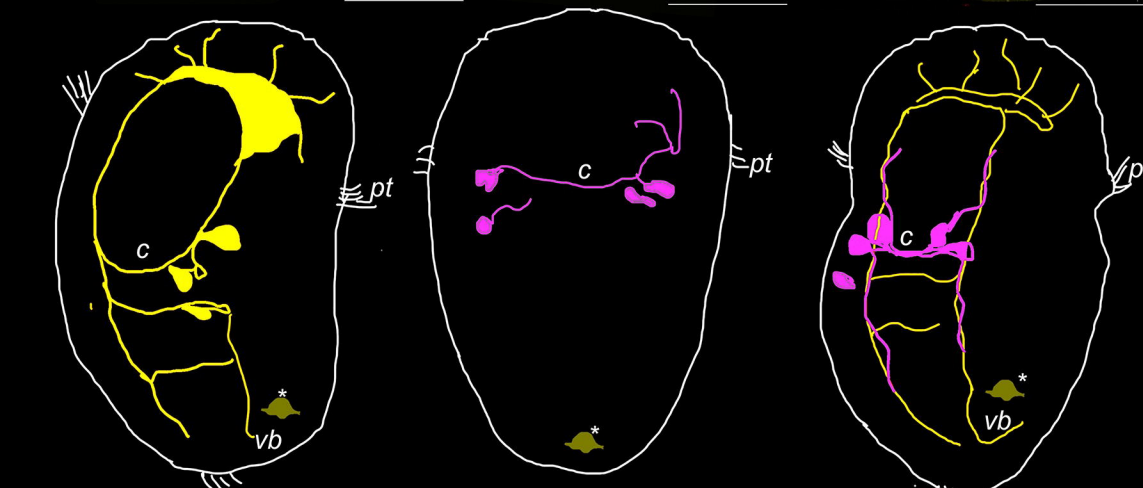



*D. glyociliatus*, middle trochophore

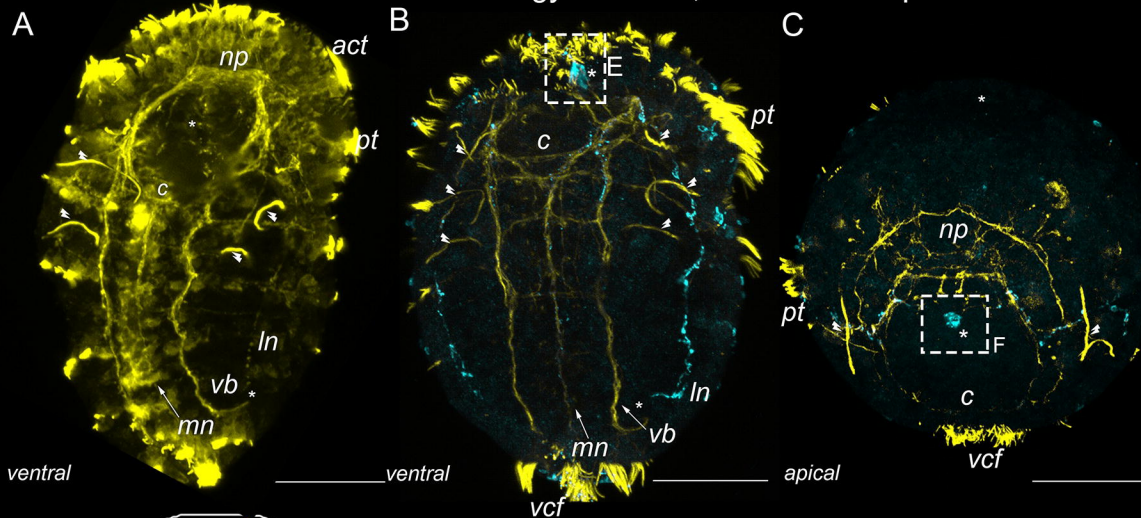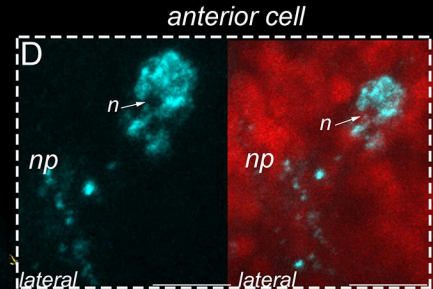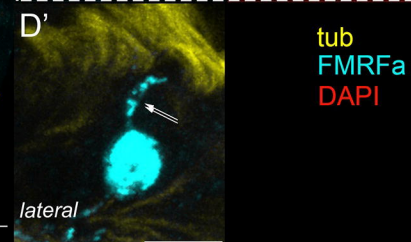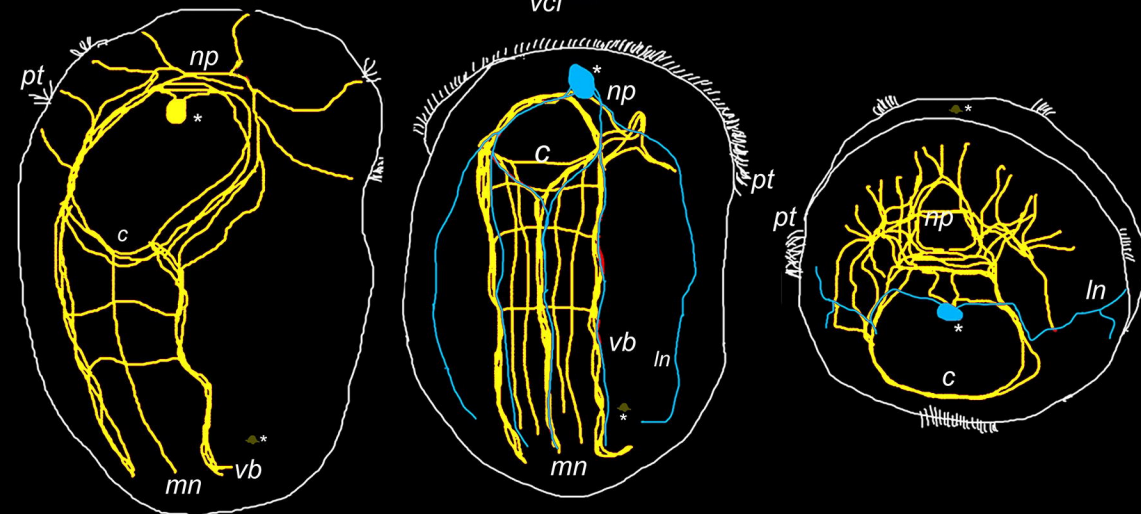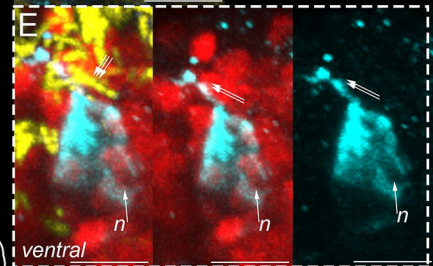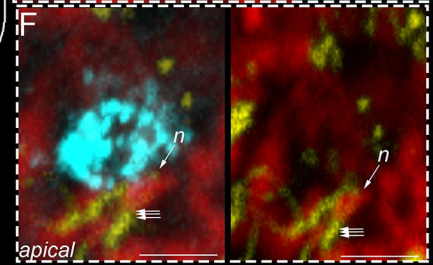

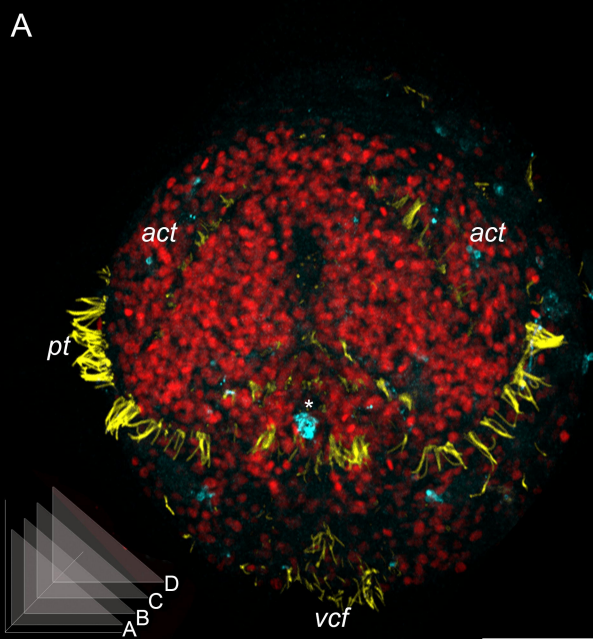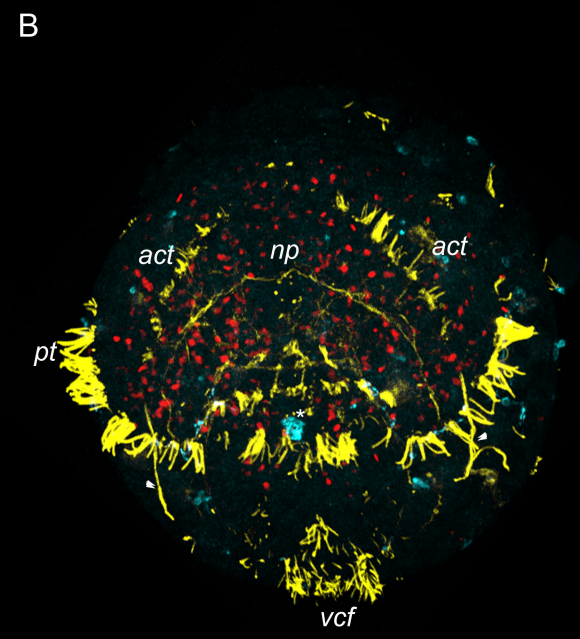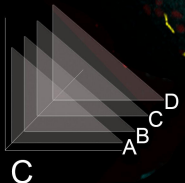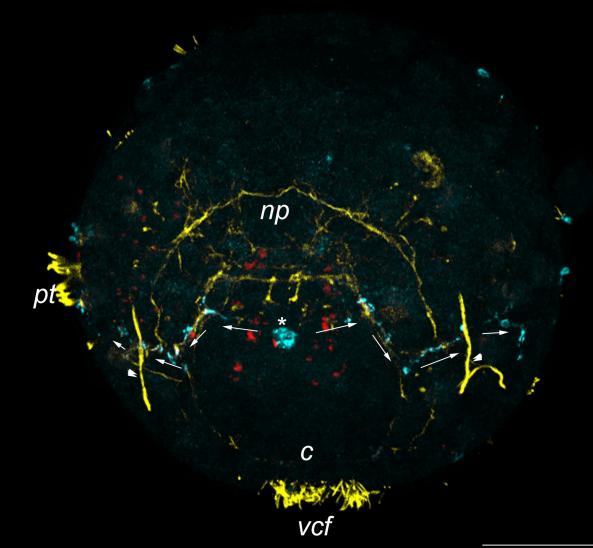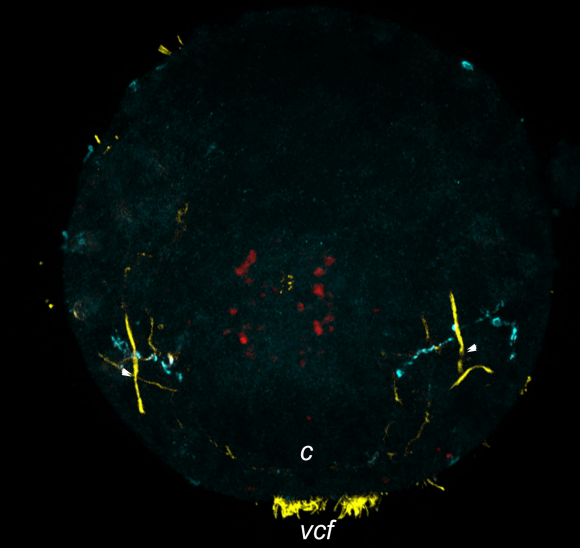



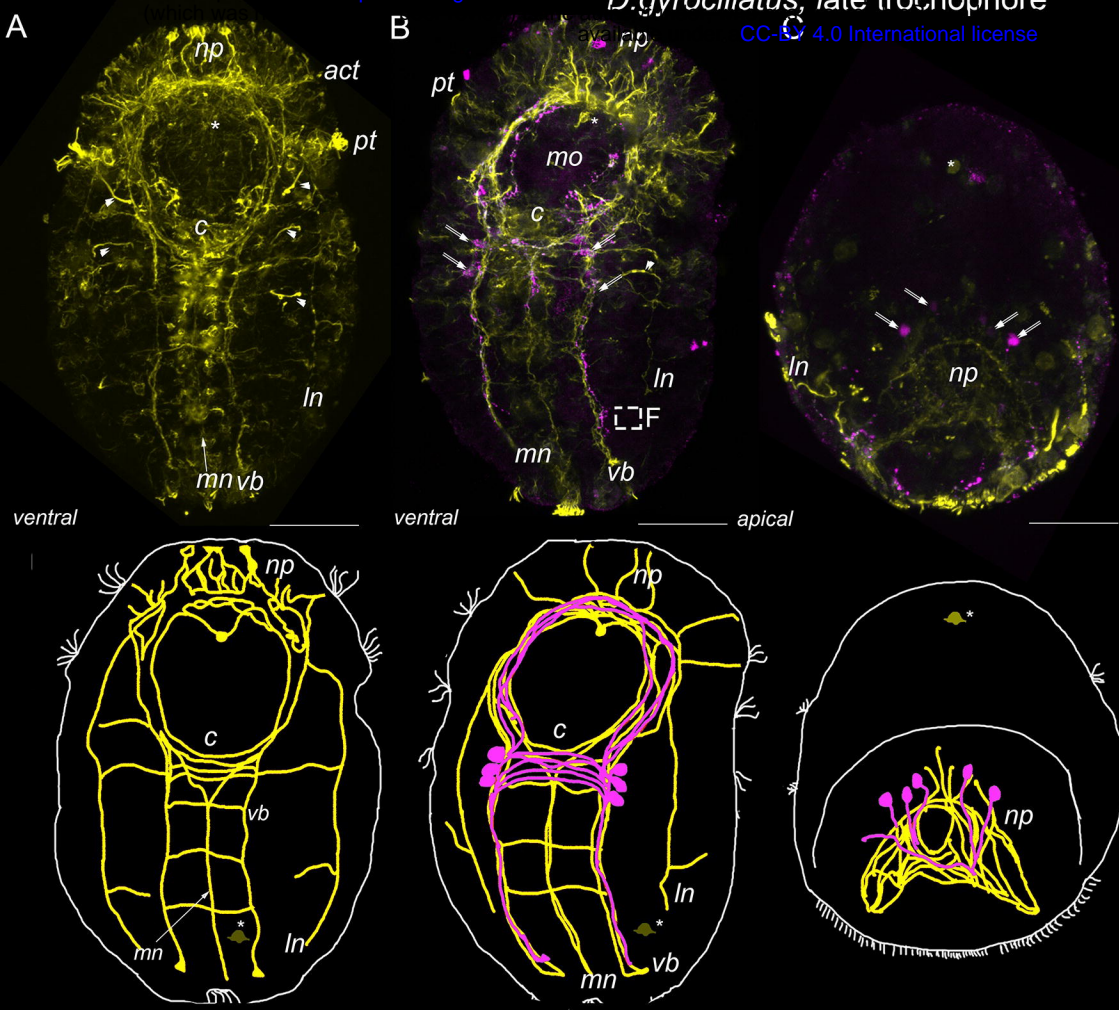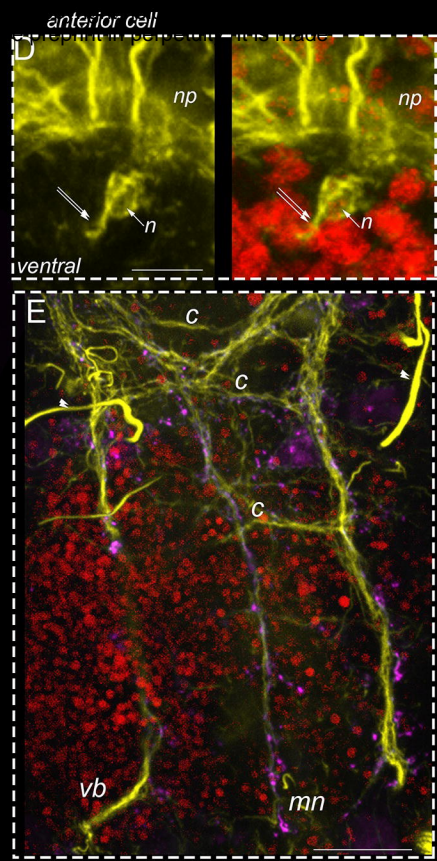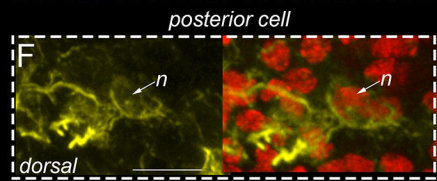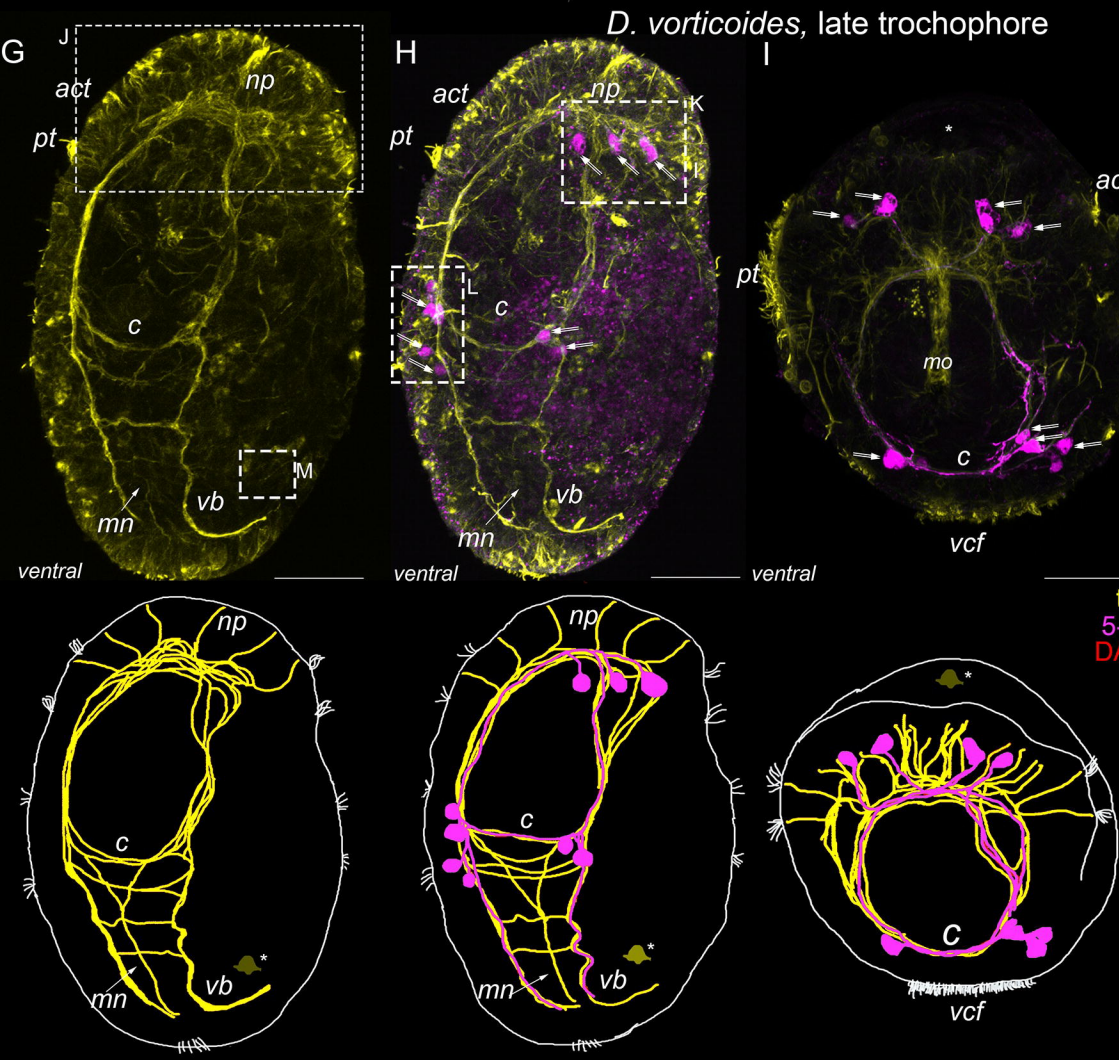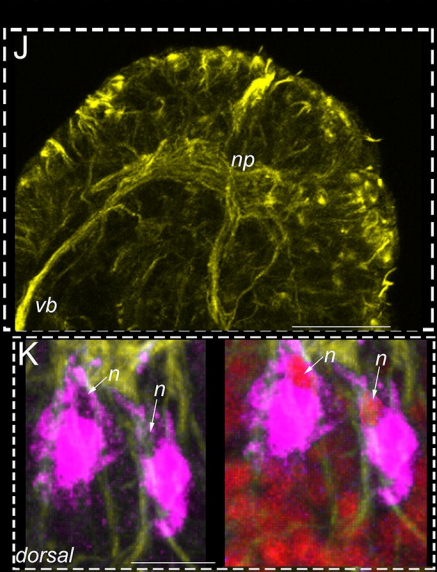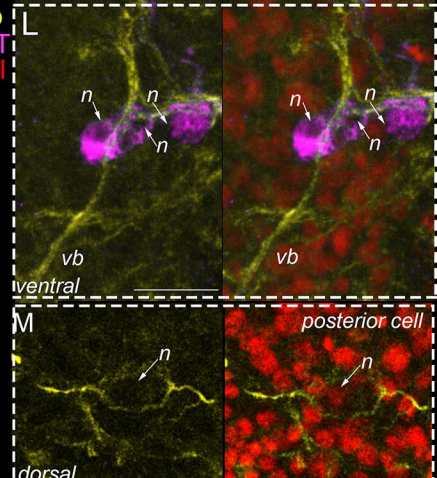

tub  
5-HT  
DAPI



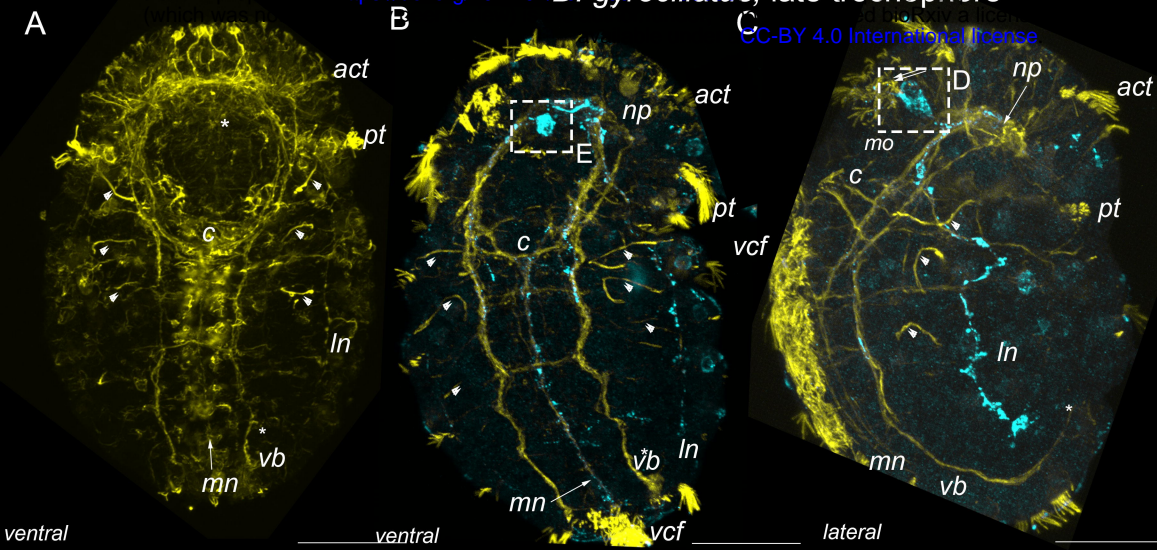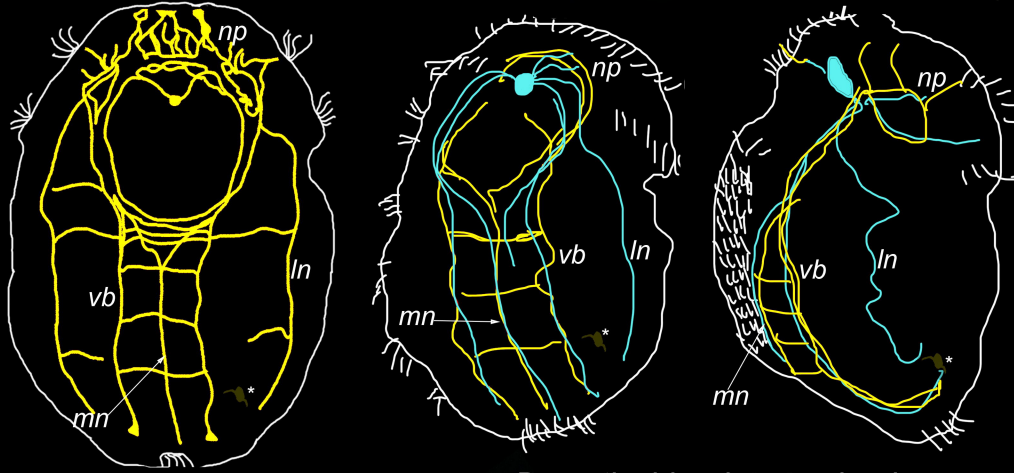

*D. vorticoides*, late trochophore

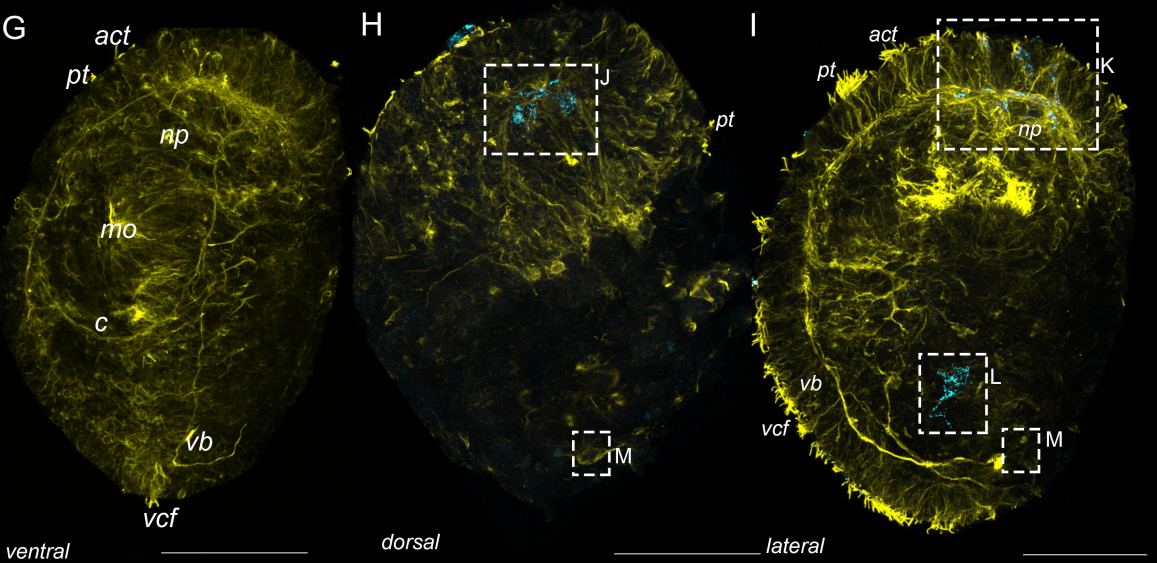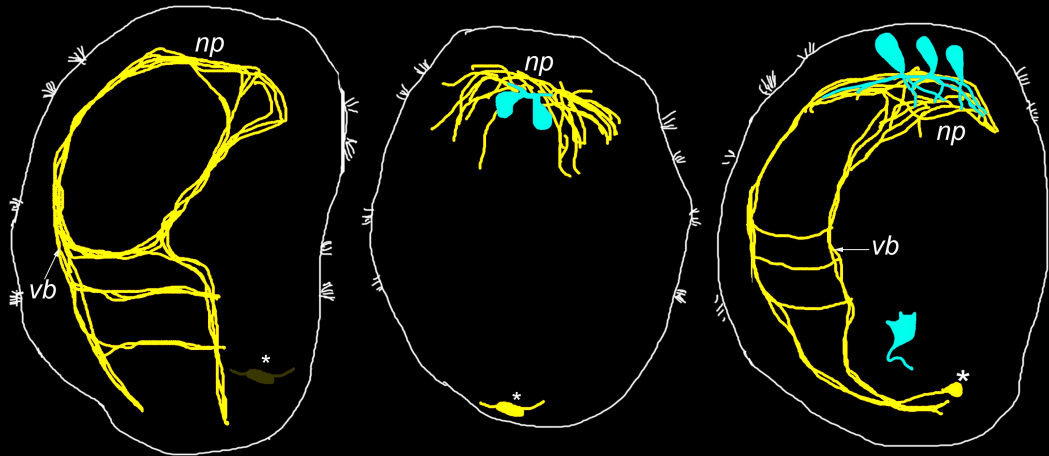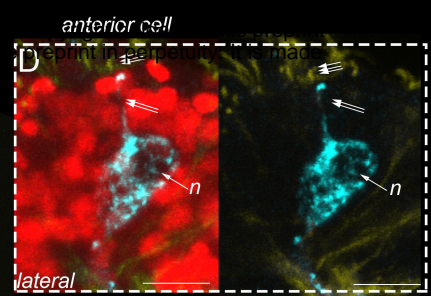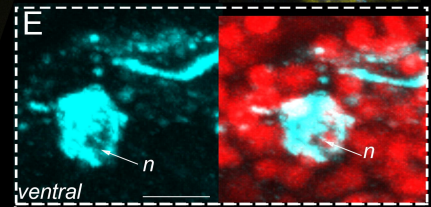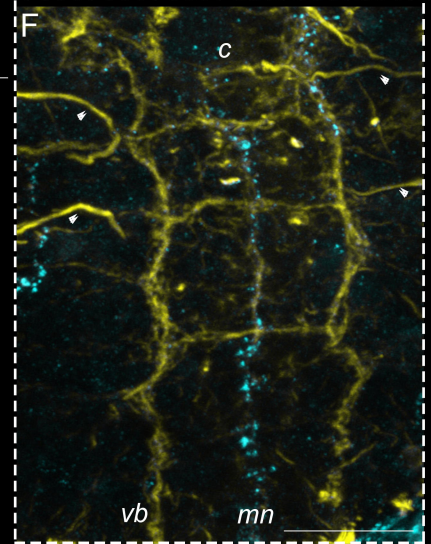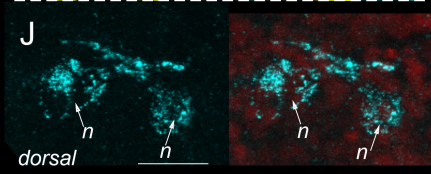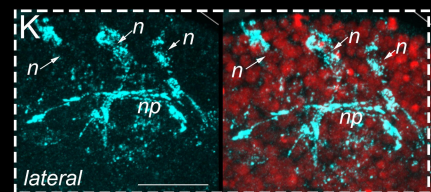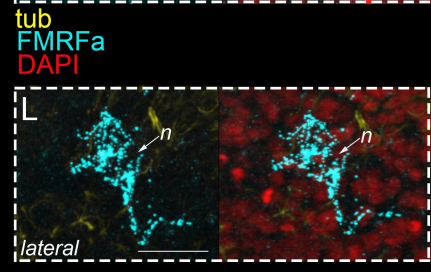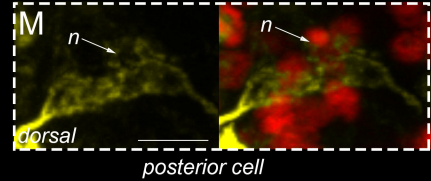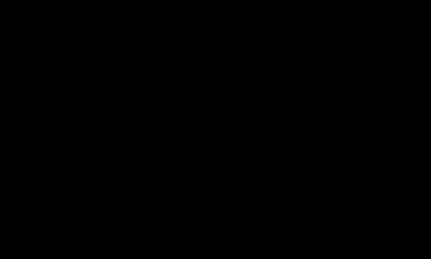

tub  
FMRFa  
DAPI







early trochophore

middle trochophore

late trochophore

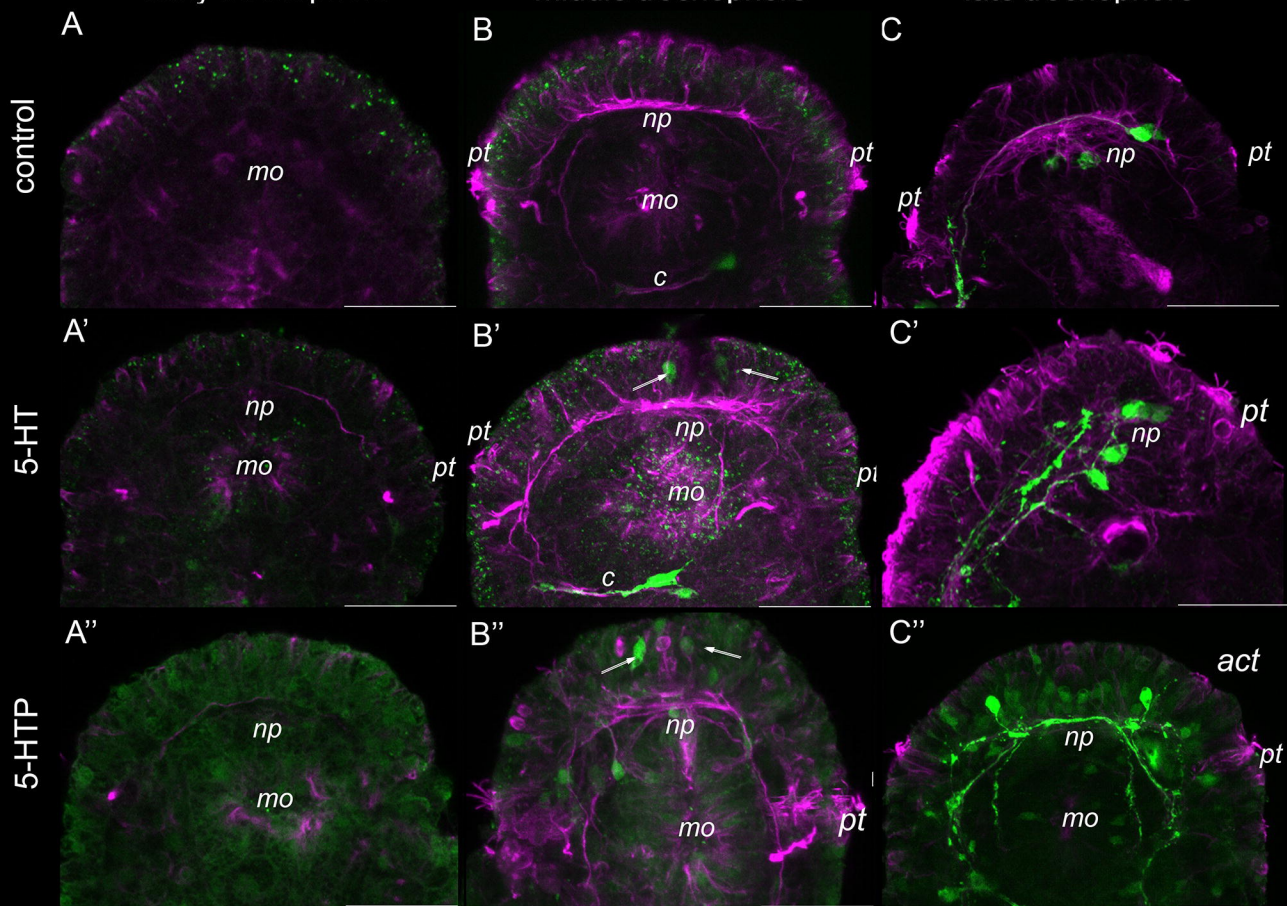

pre-hatch

juvenile

adult

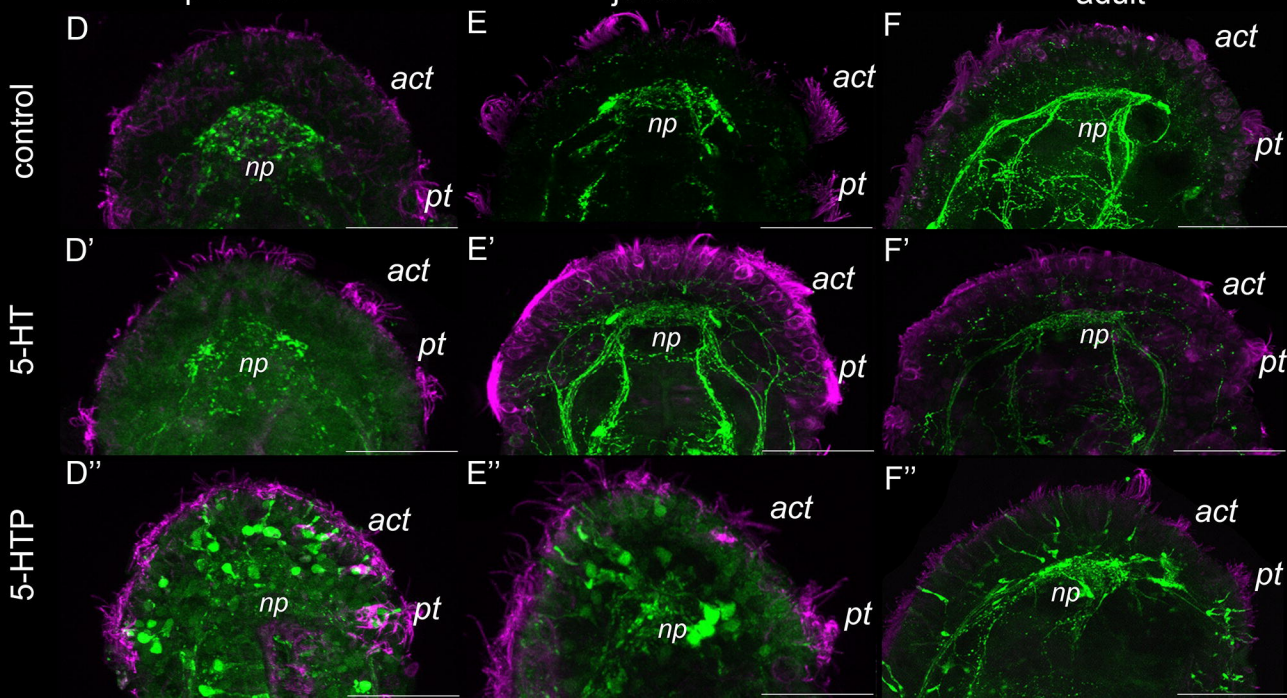



*D. gyrocolliatus*

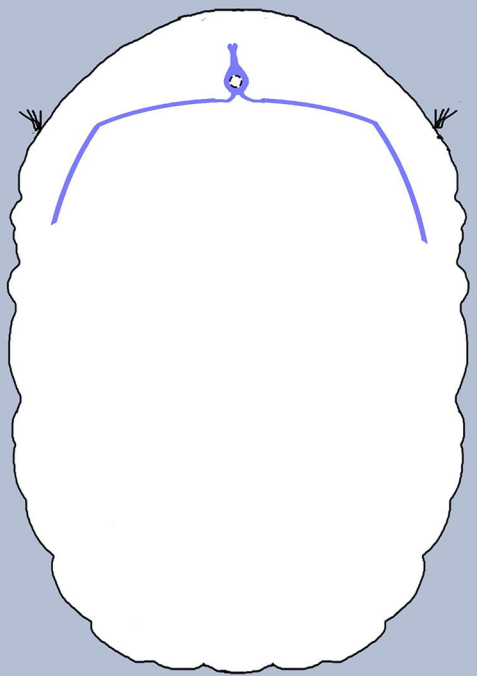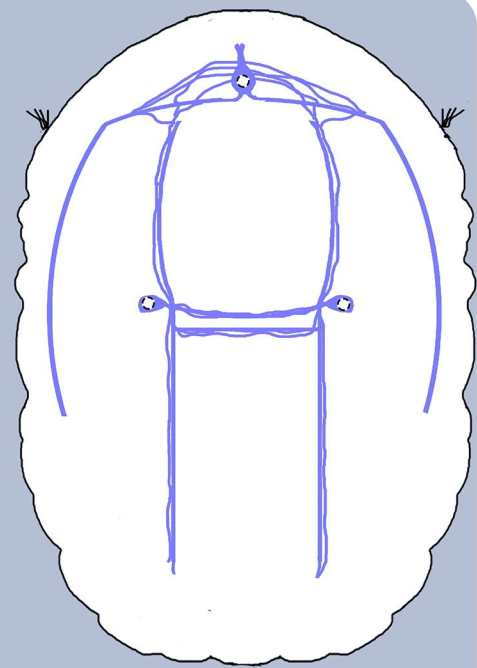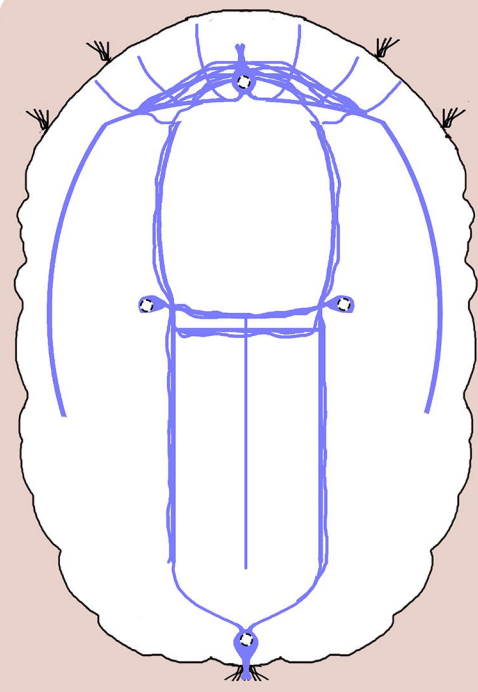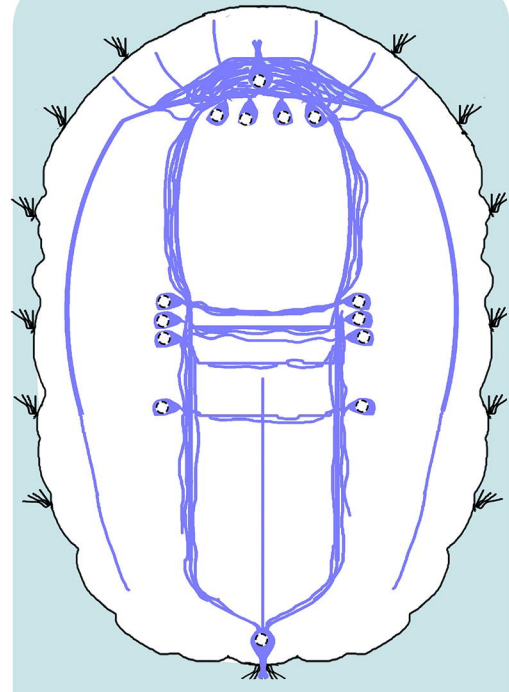

*D. vorticoides*

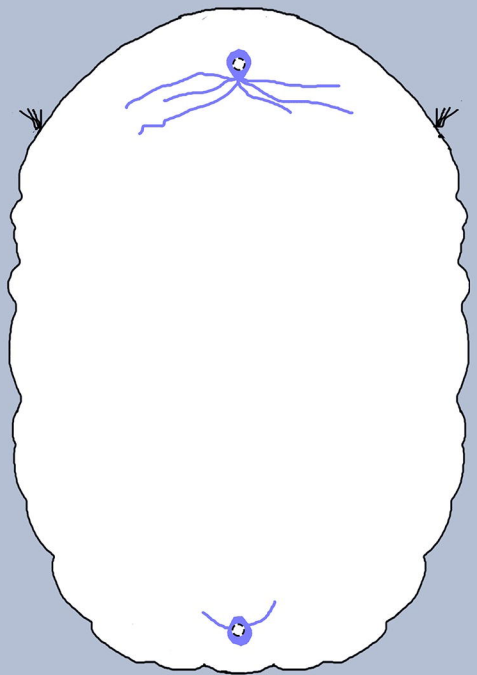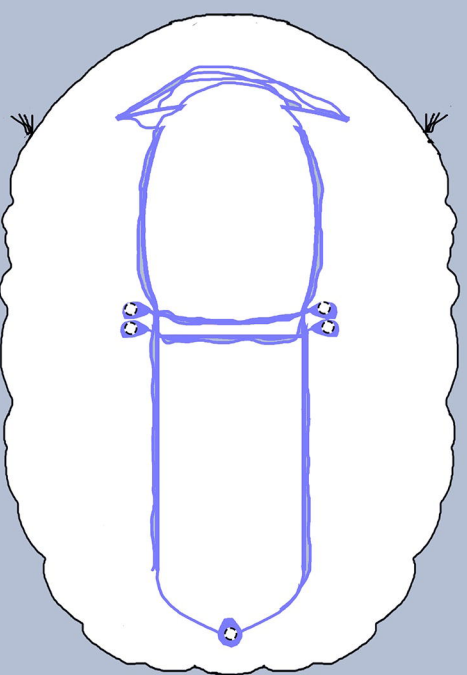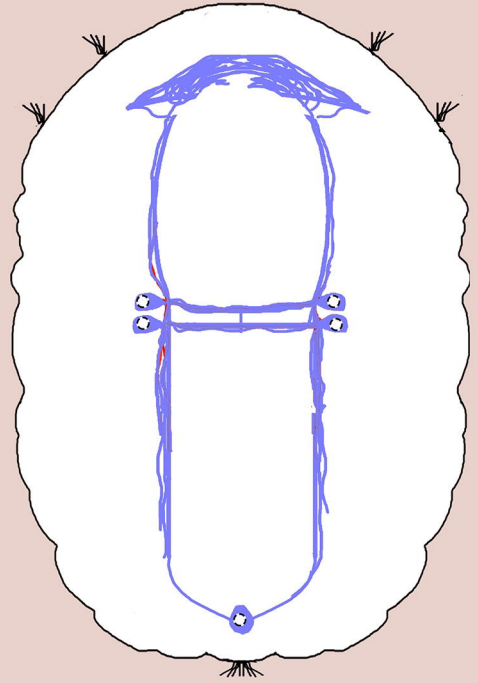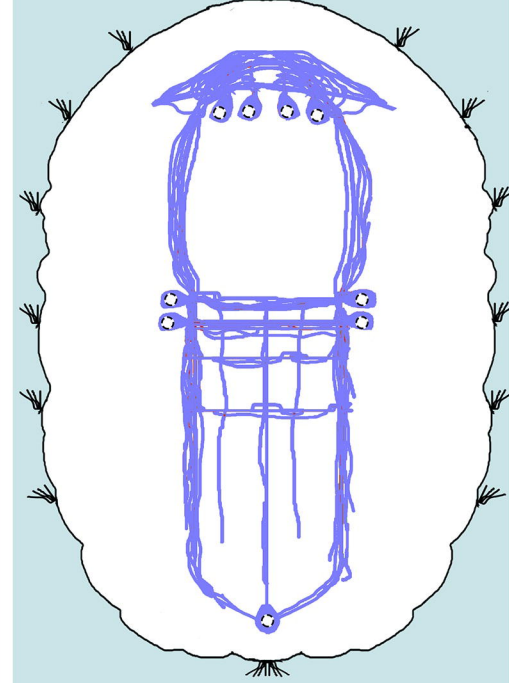

early trochophore

middle trochophore

late trochophore

*D. gyrocoliatius*

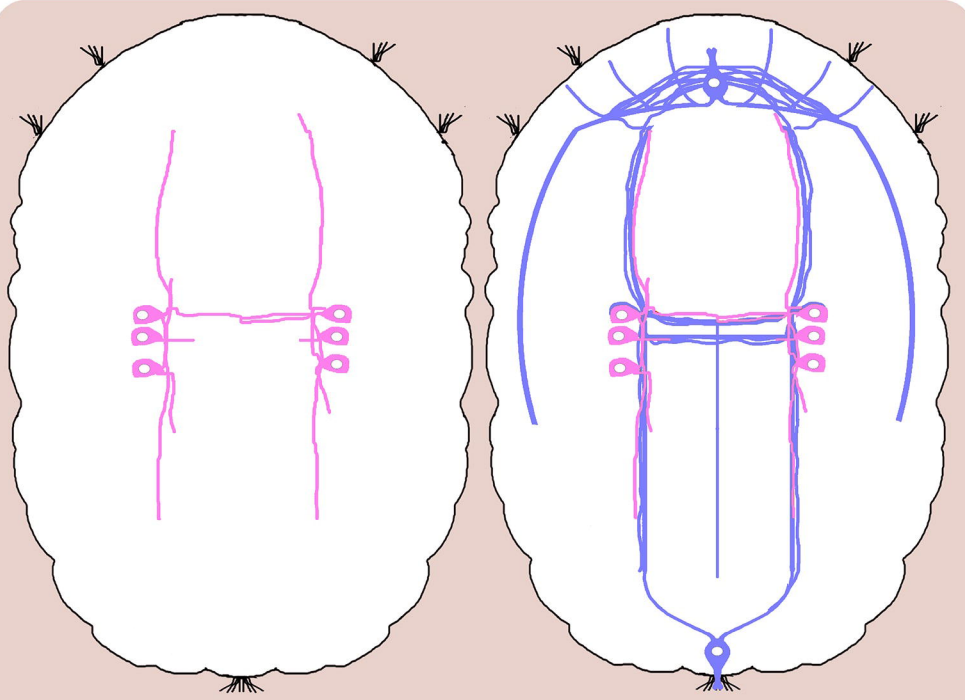

*D. vorticoides*

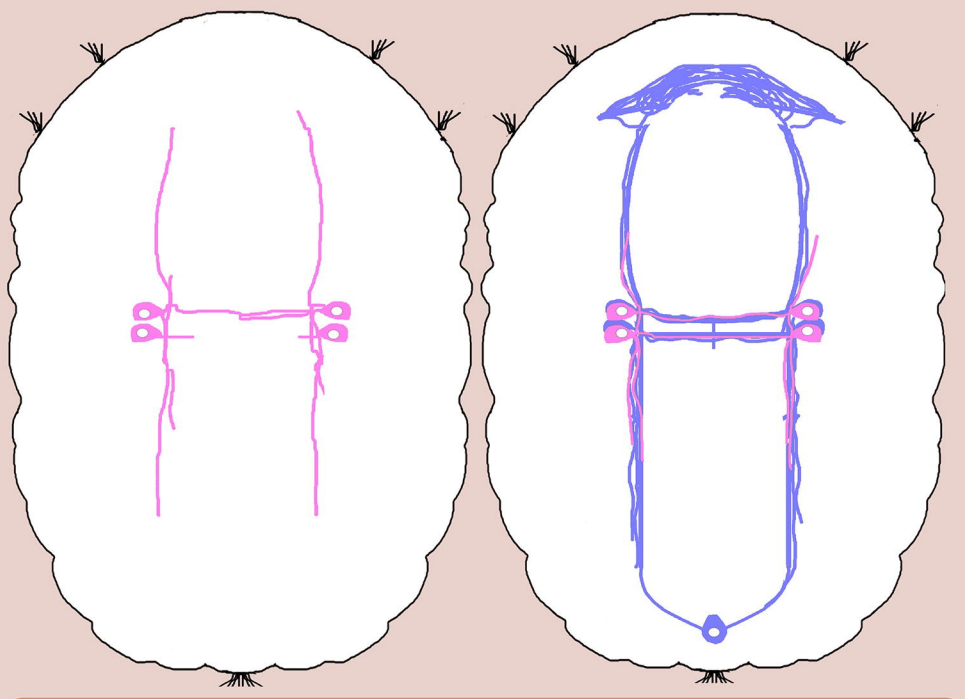

middle trochophore

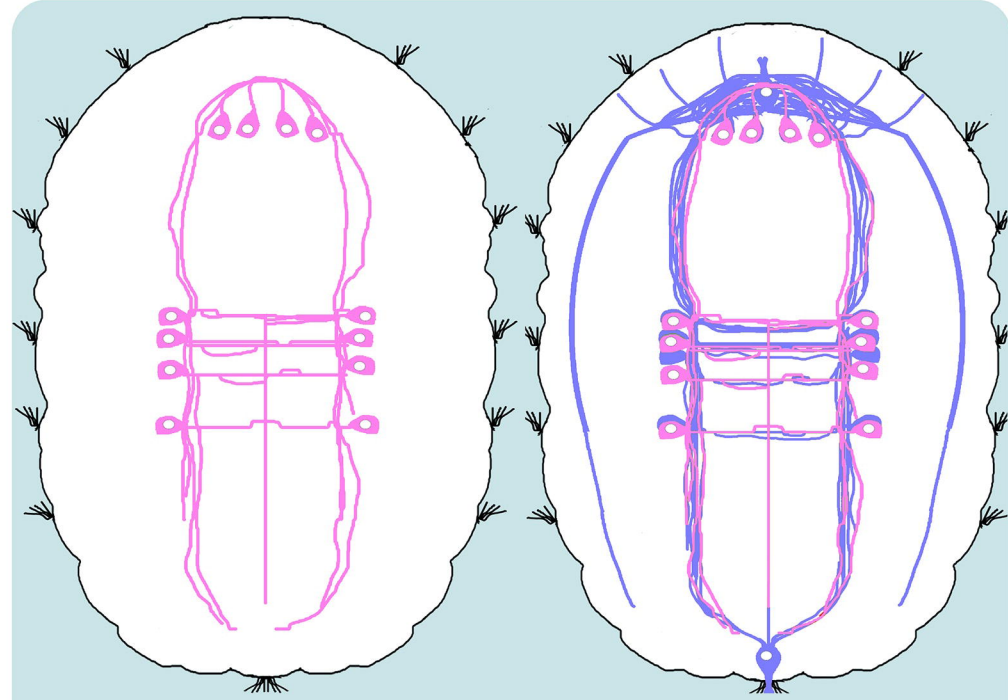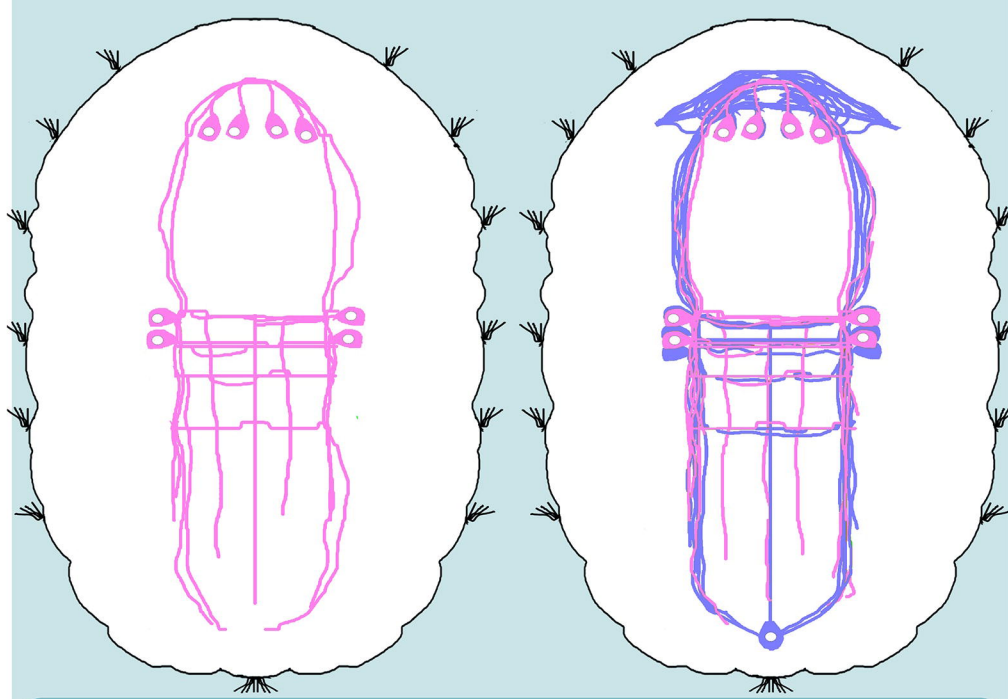

late trochophore

*D. gyrocolliatus*

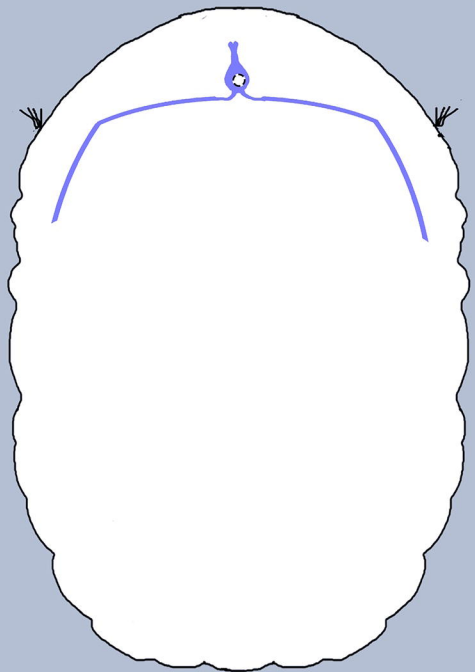

*D. vorticoides*

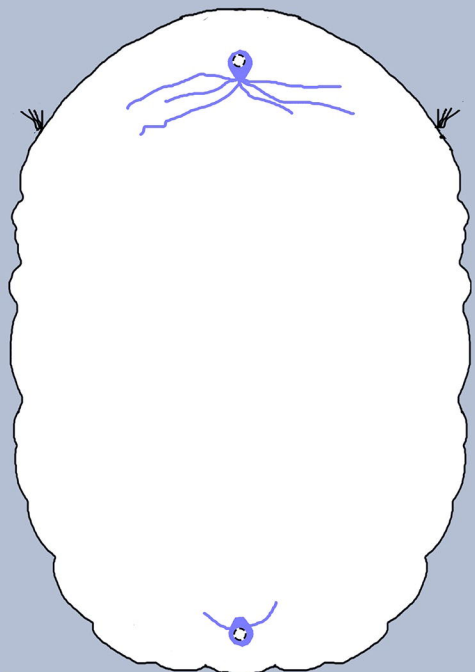

early trochophore

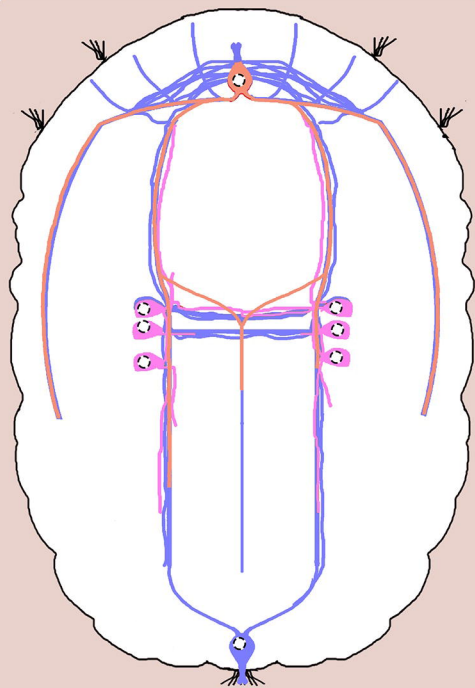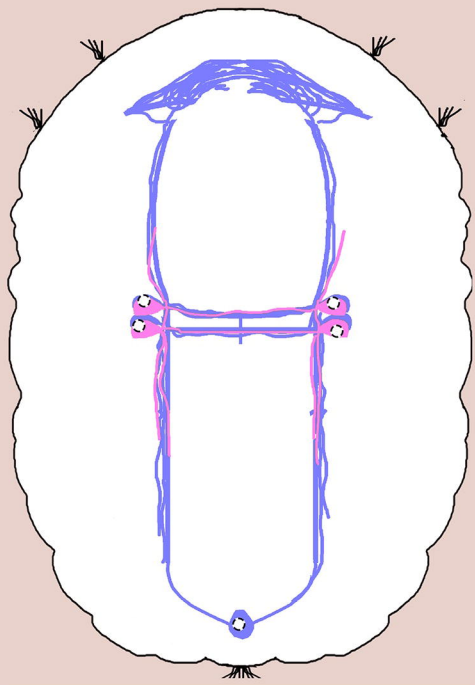

middle trochophore

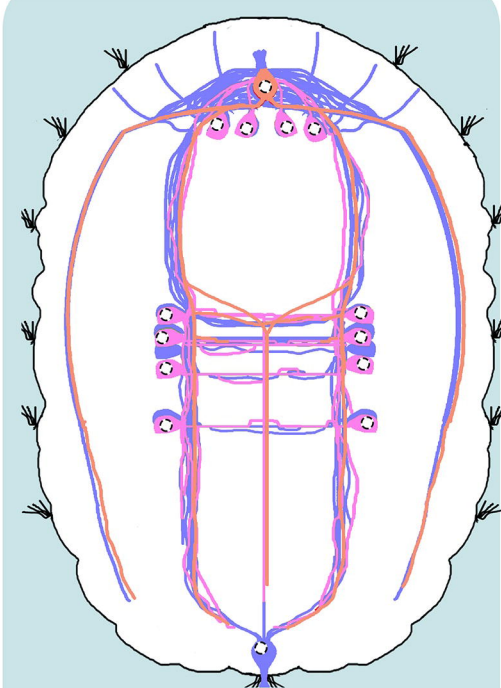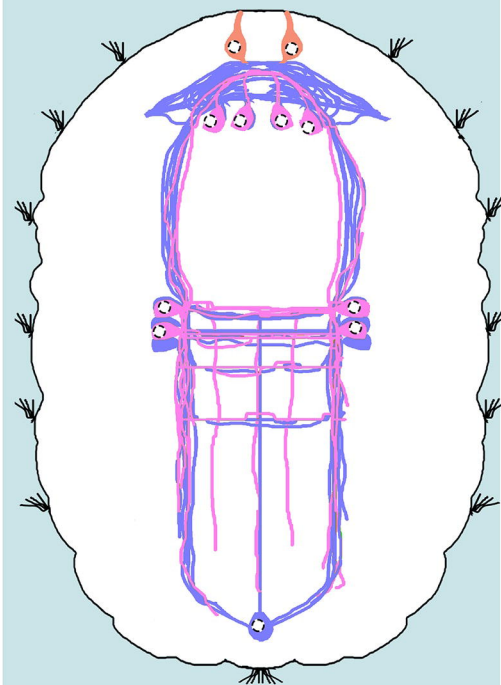

late trochophore

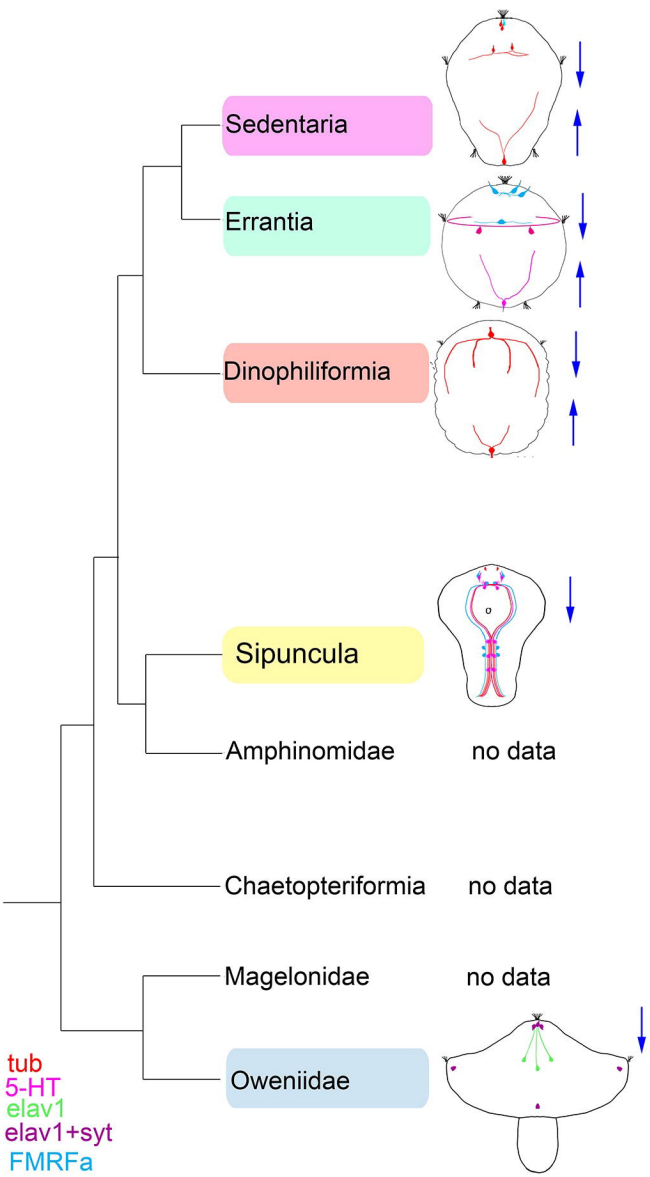

# Annelida



*D. gyrociliatus*

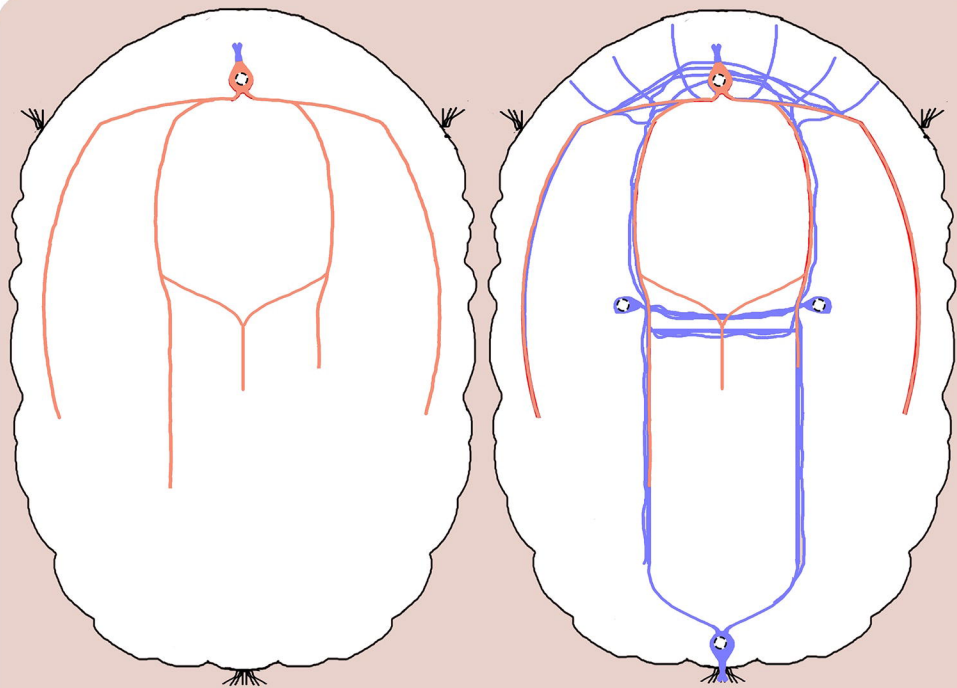

*D. vorticoides*

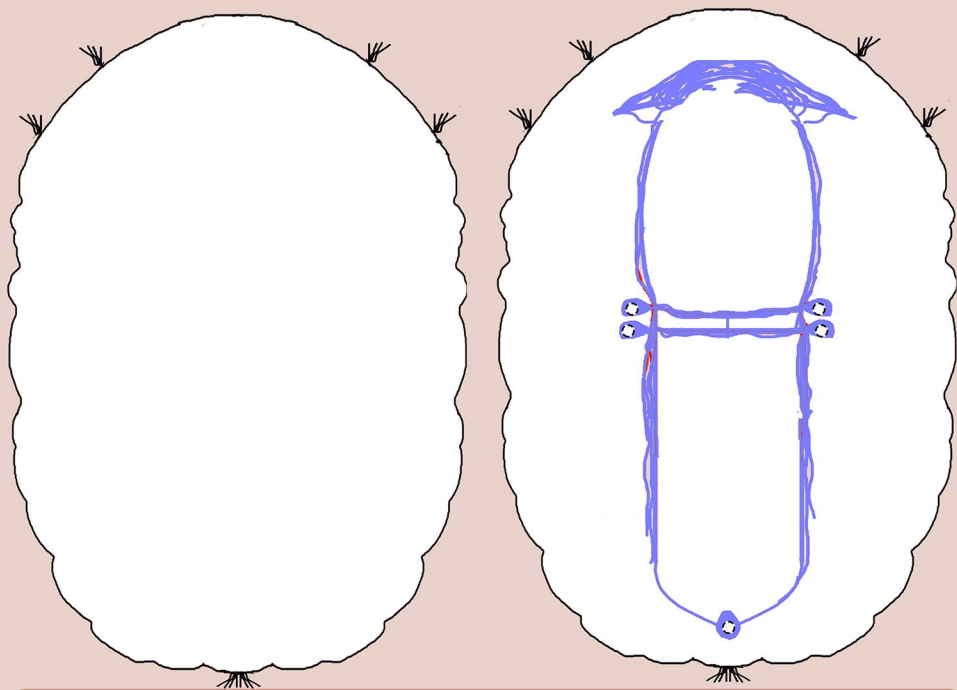

middle trochophore

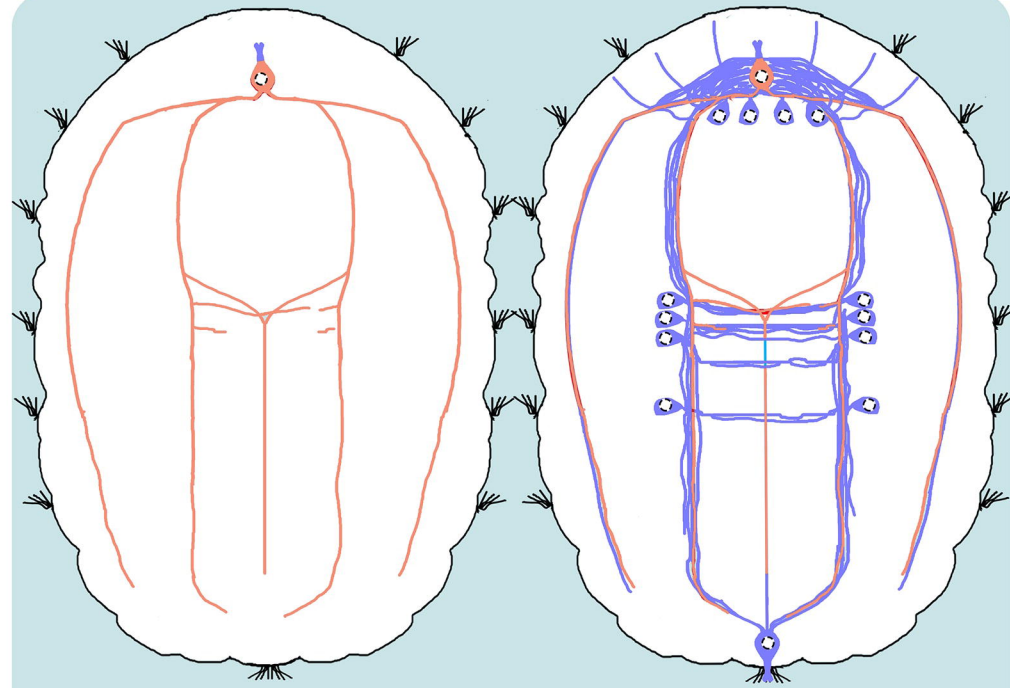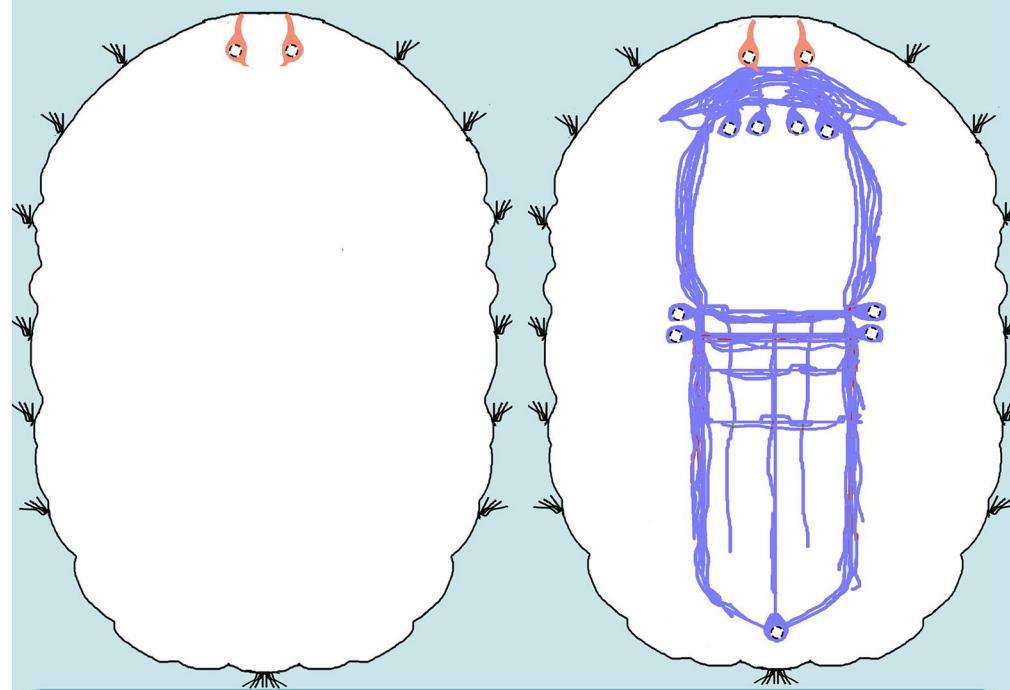

late trochophore
